# Supplementary material for: The course and prognostic factors of cognitive status after central nervous system trauma: a systematic review protocol
Source: PubMed Central journal article supplement — BMJ Open. 2017 Sep 18;7(9):e017165. doi: 10.1136/bmjopen-2017-017165 (PMC5623529; doi:10.1136/bmjopen-2017-017165), 2017-09-18
Supplement: bmjopen-2017-017165.draft_revisions.pdf [file bmjopen-2017-017165.draft_revisions.pdf]

# BMJ Open

BMJ Open is committed to open peer review. As part of this commitment we make the peer review history of every article we publish publicly available.

When an article is published we post the peer reviewers' comments and the authors' responses online. We also post the versions of the paper that were used during peer review. These are the versions that the peer review comments apply to.

The versions of the paper that follow are the versions that were submitted during the peer review process. They are not the versions of record or the final published versions. They should not be cited or distributed as the published version of this manuscript.

BMJ Open is an open access journal and the full, final, typeset and author-corrected version of record of the manuscript is available on our site with no access controls, subscription charges or pay-per-view fees (<http://bmjopen.bmj.com>).

If you have any questions on BMJ Open's open peer review process please email [editorial.bmjopen@bmj.com](mailto:editorial.bmjopen@bmj.com)

# BMJ Open

## The course and prognostic factors of cognitive status after central nervous system trauma: A systematic review protocol

|                                 |                                                                                                                                                                                                          |
|---------------------------------|----------------------------------------------------------------------------------------------------------------------------------------------------------------------------------------------------------|
| Journal:                        | <i>BMJ Open</i>                                                                                                                                                                                          |
| Manuscript ID                   | bmjopen-2017-017165                                                                                                                                                                                      |
| Article Type:                   | Protocol                                                                                                                                                                                                 |
| Date Submitted by the Author:   | 07-Apr-2017                                                                                                                                                                                              |
| Complete List of Authors:       | Mollayeva , Tatyana; Toronto Rehabilitation Institute, Research; University of Toronto, Rehabilitation Sciences Institute<br>Colantonio, Angela; University of Toronto, Rehabilitation Science Institute |
| <b>Primary Subject Heading</b>: | Neurology                                                                                                                                                                                                |
| Secondary Subject Heading:      | Rehabilitation medicine, Research methods                                                                                                                                                                |
| Keywords:                       | traumatic brain injury, spinal cord injury, prognosis, cognition, Ia level of evidence, sex differences                                                                                                  |
|                                 |                                                                                                                                                                                                          |

SCHOLARONE™  
Manuscripts

1  
2  
3 **Title:** The course and prognostic factors of cognitive status after central nervous system trauma:  
4  
5 A systematic review protocol  
6  
7  
8  
9  
10  
11

12 **Authors:** Tatyana Mollayeva, MD, PhD <sup>1-3</sup>, Angela Colantonio, PhD <sup>1-3</sup>  
13  
14

15 **Author details**

16  
17 <sup>1</sup>Rehabilitation Sciences Institute, Faculty of Medicine, University of Toronto, Canada <sup>2</sup>Toronto  
18 Rehab-University Health Network, Ontario, Canada <sup>3</sup>Acquired Brain Injury Research Lab,  
19 University of Toronto, Canada  
20  
21  
22  
23  
24  
25  
26

27 **Tatyana Mollayeva, MD, PhD (corresponding author)**

28 Postdoctoral research fellow

29 Toronto Rehabilitation Institute

30 550 University Avenue, Rm 11207

31 Toronto, Ontario M5G 2A2

32 tatyana.mollayeva@utoronto.ca

33 tel: 416-597-3422 ext 7848

34 fax: 416-946-8570  
35  
36  
37  
38  
39  
40  
41  
42  
43  
44  
45  
46  
47

48 **Angela Colantonio, PhD**

49 Director, Rehabilitation Sciences Institute

50 University of Toronto

51 160-500 University Ave.  
52  
53  
54  
55  
56  
57  
58  
59  
60

1  
2  
3 Toronto, Ontario M5G 1V7

4  
5 angela.colantonio@utoronto.ca

6  
7  
8 tel: 416-978-1098

9  
10 fax: 416-946-8570

11  
12  
13  
14 **Word count: 3886**

15  
16  
17  
18  
19  
20  
21  
22  
23  
24  
25  
26  
27  
28  
29  
30  
31  
32  
33  
34  
35  
36  
37  
38  
39  
40  
41  
42  
43  
44  
45  
46  
47  
48  
49  
50  
51  
52  
53  
54  
55  
56  
57  
58  
59  
60

For peer review only

## **Abstract**

*Introduction:* Traumatic brain injury (TBI) is among the most disabling injuries, resulting in a range of cognitive impairments. Traumatic spinal cord injury (SCI) often occurs in conjunction with TBI; the two are best considered together in the context of trauma to the central nervous system (CNS). Despite strong indications of cognitive dysfunction in CNS trauma, little is known about its natural history or relationship with other factors. The current protocol outlines a strategy for a systematic review that will identify, assess, and critically appraise studies that assessed cognition in patients with CNS trauma on at least two separate time points post-injury.

*Methods and analysis:* Medline, Central, Embase, Scopus, PsycINFO, and supplemental PubMed were systematically searched for peer-reviewed English language publications with a longitudinal design that focus on cognition in adults with either TBI, or SCI, or both from inception to December 2016. Preferred Reporting Items for Systematic Reviews and Meta-Analyses guidelines will be utilised in conducting and reporting the review. Results will be grouped by (a) prognostic factors of cognitive function; and (b) development of, or time until development of, cognitive deficit in patients with CNS trauma. To determine the course of cognitive status, matching assessment times will be grouped with their corresponding values and a sample size-weighted mean value will be calculated. Close attention will be paid to the properties of measurements used to assess cognition. Age and sex will be treated as covariates.

*Ethics and dissemination:* The authors will publish findings from this review in a peer-reviewed scientific journal and present the results at national and international conferences. This review will provide an increase in scientific certainty regarding prognostic factors and natural history of

1  
2  
3 cognitive status in males and females with CNS trauma, informing clinicians, policy makers, and  
4  
5 future researchers on the topic.  
6  
7  
8  
9

10 *Registration details:* CRD42017055309.  
11

12  
13  
14 **Keywords:** traumatic brain injury; spinal cord injury; cognition; dysfunction; prognosis; natural  
15  
16 history; males, females; Ia level of evidence  
17  
18  
19  
20  
21  
22  
23  
24  
25  
26  
27  
28  
29  
30  
31  
32  
33  
34  
35  
36  
37  
38  
39  
40  
41  
42  
43  
44  
45  
46  
47  
48  
49  
50  
51  
52  
53  
54  
55  
56  
57  
58  
59  
60

### **Strengths and limitations of this study**

- During the development phase of the project, concepts and hypotheses were formulated based on a synthesis of relevant discoveries across various disciplines and previous research
- The multilevel risk of bias assessment allows to detect main flaws in the individual studies' design and inform future research on the topic
- Special attention will be paid to measurements used to assess cognitive function in patients with CNS trauma
- We acknowledge expected heterogeneity in the primary studies, with variation between studies in sample characteristics, as well as in definitions of primary outcome
- Severe CNS trauma cases expect to be underrepresented in the inception cohorts and the majority of the patients expect to be men; this would limit the precision of estimates and generalizability of results
- We acknowledge chance for publication bias due to inclusion of only peer-reviewed studies published in English.

## Introduction

### *Description of the condition*

Central nervous system (CNS) trauma-- including traumatic brain injury (TBI) and traumatic spinal cord injury (SCI) [1]-- has been implicated as a risk factor for a range of cognitive impairments, particularly in the domains of attention, memory, emotion, and behaviour.[2-4] Recent studies have presented solid evidence that patients with a history of CNS trauma may develop various neurodegenerative disorders including Alzheimer's disease (AD).[4, 6] However, our understanding of *when* (i.e., post-injury timeframe) and *in whom* (i.e., characteristic of an injured person) AD develops after CNS trauma (TBI, SCI, or both) -- with respect to sustained and/or degrading cognitive impairment post-injury-- remains limited,[4, 7, 8] and reported rates of cognitive decline after TBI and traumatic SCI are quite variable.[9, 10] This variability has prompted interest in longitudinal studies that have focused on cognition in persons with CNS trauma across their lifespans post-injury.[11, 12] To assess longitudinal changes in cognitive status post-injury, evaluative instruments or composite tests able to measure changes in cognition after CNS trauma over time are crucial.[13] A recent study of factors associated with the rate of decline and evolution from mild cognitive impairment to AD dementia in elderly patients was performed, which estimated from three common global measures of cognition. This study appeared to have findings which varied depending on the evaluative measure used. [14] The study of measurements' properties of cognition in patients with CNS is still in its infancy, and-- when reporting cognitive decline associated with CNS-- evaluative properties of measurements have rarely been discussed or acknowledged. In order to come to a transparent



1  
2  
3 conclusion on the course of cognitive status after TBI, properly evaluating measurements'  
4  
5 properties must be done in the process of data synthesis.  
6  
7

8  
9 *Description of measurements' needs*  
10

11  
12 Under the framework of Kirshner and Guyatt, measurements used to evaluate change over time  
13  
14 in any domain should be (1) reliable (i.e., possess adequate internal consistency and  
15  
16 responsiveness test-retest reliability in the population of interest) and (2) correspond closely to  
17  
18 the construct to be measured.[15] Until now, research on cognitive status after TBI has focused  
19  
20 on patients' 'capacity' (i.e., what the patient can do when he or she is invited to), 'perceived  
21  
22 ability' (i.e., what the patient thinks they can do), and 'cognitive activity' (i.e., what the patient  
23  
24 can actually do), which are different constructs. As such, when assessing CNS trauma-related  
25  
26 deficits in language, perception, memory, reasoning, attention, etc., a solid knowledge of the  
27  
28 tests applied to measure these deficits is of great importance.  
29  
30  
31  
32  
33

34  
35 *How sex might affect results*  
36

37  
38 Another important area to consider in the study of cognition after CNS trauma and the risk of  
39  
40 development of AD is sex (i.e., biological differences between men and women). Often, CNS  
41  
42 trauma is considered to be an injury of males. Overall and in almost every age group, TBI and  
43  
44 SCI more frequently occur in males than in females.[16, 17] These differences may reflect the  
45  
46 high rate of general injuries among males and/or differences in risk taking societal roles and  
47  
48 behaviours, relevant to the construct of gender, rather than sex.[18] In contrast, the  
49  
50 preponderance of current evidence is that an increased risk of AD exists in women, which is  
51  
52 even more pronounced in advanced age.[19] The reason behind sex differences in the risk of AD  
53  
54  
55  
56  
57  
58  
59  
60

1  
2  
3 is unknown, especially because many human studies support the notion that oestrogen, especially  
4 brain oestradiol, improves and conserves cognitive function including memory retention.[20,21]  
5  
6 Consistent with this theoretical gap, women's traditional inequalities and disadvantages in access  
7  
8 to and control of resources have resulted in the present scarcity of data on women with CNS  
9  
10 trauma, and our knowledge of whether women and men are at different risks of developing  
11  
12 cognitive impairment after CNS trauma due to differing gendered vulnerabilities (i.e., injury risk,  
13  
14 severity, access to power and resources post-injury, help-seeking behaviours, health care system  
15  
16 use, intervention response, and rehabilitation outcomes) or conversely, being protected from it, is  
17  
18 limited. Therefore, an awareness of how cognitive status after CNS trauma varies or parallels by  
19  
20 sex across time points when taking gender into account is critical to advance CNS trauma and  
21  
22 AD research.  
23  
24  
25  
26  
27  
28  
29

### 30 *How age might affect results*

31  
32  
33  
34 Age is the single most important risk factor for various domains of cognitive decline across  
35  
36 diverse cultural groups and geographic regions, including memory, language, processing speed,  
37  
38 and executive functioning.[22] CNS neurogenesis is known to change during one's lifespan, and  
39  
40 this is likely reflected in age-related risk for cognitive decline. However, research has  
41  
42 highlighted that associations may vary across cohorts,[22] suggesting that different rates of  
43  
44 cognitive decline might contribute to the global variation in age-related dementia prevalence.  
45  
46 Likewise, consistent associations with genetics, cardiovascular health, and lifestyle and cognitive  
47  
48 function have been accumulated in research, each of which is relevant to the discussion of the  
49  
50 higher likelihood of being involved in an injury with CNS outcome.[23] The need to explore  
51  
52  
53  
54  
55  
56  
57  
58  
59  
60

1  
2  
3 how age-dependent associations with other risk factors in patients with CNS trauma cannot be  
4  
5 undermined.  
6  
7

### 8 9 *Objectives*

10  
11  
12 The aim of the current study is to identify, appraise, and synthesize all available longitudinal  
13 studies relevant to the discussion of cognitive function in males and females following CNS  
14 trauma in an attempt to: (1) determine diagnostic/prognostic factors of development of cognitive  
15 deficits in patients with CNS trauma at the baseline and follow-up; (2) determine the course of  
16 cognitive function in patients with CNS trauma; and (3) summarize sex- and age-stratified results  
17 pertaining to the course of cognitive status in patients with CNS trauma. Finally, the current  
18 study intends to provide a systematic consideration, solid description, and in-depth  
19 understanding of the range of measurements utilized to assess cognition in CNS trauma research.  
20 This study also aims to report on these instruments' reliability and construct validity, which are  
21 key psychometric properties necessary for evaluative purposes. This study is operating under the  
22 hypothesis which states that acutely derived CNS trauma variables alone (i.e., age, sex, TBI  
23 mechanism, level of SCI, injury severity, etc.), are not sufficient to accurately predict cognitive  
24 status and/or its domains after CNS trauma. Furthermore, it is hypothesized that cognitive  
25 deficits following CNS trauma are the product of diverse external and internal influences acting  
26 on a genetically determined substrate and that many of these external influences are modifiable  
27 (Figure 1). The current protocol outlines a strategy for this systematic review.  
28  
29  
30  
31  
32  
33  
34  
35  
36  
37  
38  
39  
40  
41  
42  
43  
44  
45  
46  
47  
48  
49  
50

### 51 **Methods and analysis**

52  
53  
54  
55  
56  
57  
58  
59  
60

1  
2  
3 The review will be conducted and reported in compliance with the Preferred Reporting Items for  
4 Systematic Reviews and Meta-Analyses (PRISMA) guidelines.[24] In accordance with these  
5  
6  
7  
8  
9  
10  
11  
12  
13  
14  
15  
16  
17  
18  
19  
20  
21  
22  
23  
24  
25  
26  
27  
28  
29  
30  
31  
32  
33  
34  
35  
36  
37  
38  
39  
40  
41  
42  
43  
44  
45  
46  
47  
48  
49  
50  
51  
52  
53  
54  
55  
56  
57  
58  
59  
60

The review will be conducted and reported in compliance with the Preferred Reporting Items for Systematic Reviews and Meta-Analyses (PRISMA) guidelines.[24] In accordance with these guidelines, the systematic review protocol was registered with the International Prospective Register of Systematic Reviews (PROSPERO) [25] on January 16, 2017 (registration number, CRD42017055309).

### *Criteria for considering studies for this review*

#### Types of studies

- Peer-reviewed published longitudinal studies (i.e., studies that have cognition\* on at least two separate occasions) in English, conducted in adults with a clinical diagnosis of CNS trauma (TBI, or SCI, or both).
- Studies that were primarily designed to investigate the predictors and the course of cognitive deficits in patients with CNS trauma.

#### Participants and assessment

- Males and females aged 18 years or older, with TBI or SCI or both, defined by clinical criteria. We do not set limitations to the setting in which the research took place.
- Any means of diagnosis or assessment of cognition.

#### Types of outcome measures

The primary outcomes include (i) cognitive function or (ii) development of-- or time until development of-- possible or probable cognitive deficit in patients with CNS trauma.

1  
2  
3 \*Cognitive function: cognitive function is referred to as the mental action or process of acquiring  
4 knowledge and understanding through thought, experience, and the senses.[26] It encompasses  
5 processes such as knowledge, attention, memory and working memory, judgment and evaluation,  
6 reasoning and "computation," problem solving and decision making, comprehension and  
7 production of language, etc.[26] Any measures of cognition (or its domain) (e.g., the presence or  
8 absence of cognitive deficits determined using a single question, a case definition of any measure  
9 of cognitive domain by a standardized clinical tool, or cognitive domain scores reported as a  
10 continuous variable) will be considered.  
11  
12  
13  
14  
15  
16  
17  
18  
19  
20  
21  
22

23 Development of cognitive deficit\* in patients with CNS trauma will be assigned based on the  
24 DSM-V criteria for mild neurocognitive development, namely: (1) evidence of modest cognitive  
25 decline from a previous level of performance in one or more cognitive domains (complex  
26 attention, executive function, learning and memory, language, perceptual motor, or social  
27 cognition) based on: (i) concern of the individual, a knowledgeable informant, or the clinician  
28 that there has been a mild decline in cognitive function; and (ii) modest impairment in cognitive  
29 performance, preferably documented by standardized neuropsychological testing or, in its  
30 absence, another quantified clinical assessment; and (2) the cognitive deficits do not interfere  
31 with the capacity for independence in everyday activities (i.e., complex instrumental activities of  
32 daily living such as paying bills or managing medications are preserved, but greater effort,  
33 compensatory strategies, or accommodation may be required.[27]  
34  
35  
36  
37  
38  
39  
40  
41  
42  
43  
44  
45  
46  
47  
48  
49

#### 50 *Exclusion criteria*

51  
52  
53

54 Types of studies:  
55  
56  
57  
58  
59  
60

- Studies investigating cognition after CNS trauma due to secondary pathological processes (e.g., oedema, intracranial haemorrhages, ischemia/infarction, and systemic intracranial conditions)
- Letters to editors and reviews without data, case reports, or reports; conference abstracts, articles with no primary data, theses, and unpublished manuscripts.

### *Search methods for the identification of studies*

In collaboration with clinical experts and a medical information specialist, a comprehensive search strategy for studying cognitive function in CNS trauma was developed. All English language, peer-reviewed studies with prospective or retrospective data collection and a longitudinal design, found through Medline, Central, Embase, Scopus, PsycINFO, and supplemental PubMed, were eligible. Searches in individual databases covered publications' time frame from inception until early December 2016. The complete search strategy can be found in Supplementary File 1.

### *Searching other resources*

Reference lists of included studies will be reviewed to identify any additional studies.

### *Selection of studies*

All searches are saved in EndNote with duplicates removed. For the first level of screening, two reviewers (TM and SM, or TM and AD) will read the titles and abstracts of all the citations from the electronic database searches and remove all citations not related to the primary research objectives. For the second level of screening, each reviewer will independently assess the full

1  
2  
3 article. If the title or abstract suggests that the study might meet the inclusion criteria, each  
4  
5 reviewer individually will assessed the full text; any conflicting views will be resolved by  
6  
7 discussion between reviewers or by seeking advice from other researchers (AC) and experts (i.e.,  
8  
9 we are currently seeking support of the Cochrane Cognition team). Studies failing to meet the  
10  
11 inclusion criteria will be excluded and the reason will be reported.  
12  
13

#### 14 15 16 *Data extraction and management* 17

18  
19 For studies fulfilling the inclusion criteria, two review authors (TM and SM for descriptive data,  
20  
21 TM and AS for outcome data) will independently extract data into data collection forms grouped  
22  
23 according to their design. The observational longitudinal studies data will be used to address all  
24  
25 research objectives. Randomized control trial (RCT) studies will be treated as cohort studies by  
26  
27 abstracting data from the control (e.g. untreated group) to address the second research objective  
28  
29 (e.g. to determine the course of cognitive impairment) in patients with CNS trauma.  
30  
31  
32

33  
34 The abstracted data will include (1) study characteristics (author names, publication year,  
35  
36 country of study, study setting, study design, sample size, method of measuring cognition and  
37  
38 cognitive domains it covers, number of participants assessed for at each time point, time between  
39  
40 assessments, and time since injury to each follow-up); (2) participant characteristics (mean age,  
41  
42 sex, definition of CNS (i.e., TBI, SCI), localization/level of injury, and injury severity); (3)  
43  
44 medication regimen, if reported; and (4) results (reported frequencies of cognitive impairments,  
45  
46 and reported predictive associations between cognition and other variables) (Table 1).  
47  
48  
49  
50

#### 51 52 53 *Data synthesis* 54 55 56 57 58 59 60

1  
2  
3 Results of each study will be divided into two main categories: prognostic factors of cognitive  
4 function across assessment times, and the course of cognitive (days)- function after CNS trauma.  
5  
6  
7

8  
9 To determine the course of cognitive dysfunction, matching assessment times (i.e. time since  
10 diagnosis when cognitive function was measured) will be grouped by their corresponding  
11 frequencies and a sample size-weighted mean frequency value will be calculated for time points  
12 with more than one contributing frequency value (i.e. more than one study reporting cognitive  
13 dysfunction at that time point). Results will also be grouped, if sufficient data exists, taking into  
14 account measurements used to assess cognitive function.  
15  
16  
17  
18  
19  
20  
21  
22  
23

24 Prognostic factors associated with cognition and/or its domain(s) will be extracted from all  
25 cohorts (and untreated/without an effect RCTs). All factors influencing the course of cognitive  
26 values/status, as reported by the author, will be considered as prognostic factors. A prognostic  
27 association will be considered as significant if the reported  $p$ -value is  $\leq 0.05$ , authors reported  
28 association as significant, or the 95% confidence intervals around a rate ratio or similar statistic  
29 did not exceed 1. Where a prognostic factor was assessed with respect to the outcome at several  
30 time-points in the same cohort, data will be extracted and reported for each follow-up time.  
31  
32  
33  
34  
35  
36  
37  
38  
39

40 Confounding factors (such as sex, heredity (if reported), sociodemographic characteristics,  
41 severity of injury, comorbid disorders, etc.) which may affect the generalizability of the study  
42 will be explored. The possible effects of measures used to assess cognition will be considered  
43 and special attention will be paid to measurements' psychometric properties, in particular,  
44 construct validity and reliability. Finally, given the nature of the research questions (i.e.  
45 prognostic factors, course) --which raises the issue of zero-time bias-- studies will be grouped  
46  
47  
48  
49  
50  
51  
52  
53  
54  
55  
56  
57  
58  
59  
60



1  
2  
3 based on whether their baseline assessments were conducted before or after the one-month post-  
4 injury mark to best address the research questions. This time point was arbitrarily set.  
5  
6  
7

8  
9 *Methodological quality and risk of bias assessment*  
10

11  
12 Study quality will be assessed independently by two reviewers (TM and SM) using the  
13 guidelines developed by Hayden et al. (2006) for assessing prognostic studies.[28] The appraisal  
14 will consist of two steps: (1) assessment of six potential sources of bias (study participation and  
15 attrition, prognostic factors and outcome measurements, confounding measurement and account,  
16 and analyses), and designation to each “Yes,” “Partly,” “No,” or “Unsure.” Results will be  
17 assessed to determine if a study has a fatal flaw or bias; based on the results, each study would be  
18 assigned “high risk of bias” or “low risk of bias”. To ensure the explicit basis for bias  
19 assessment, aspects of the trial methods on which the judgment for “high risk of bias” was based  
20 and the judgment itself-- including the trial method on which the decision of exclusion was  
21 based-- will be reported to the scientific community. For the “low risk of bias” studies, abstract  
22 data will be assessed on the relationships between measures of cognition and other variables.  
23 Any statistical measure of association (e.g., odds ratio, hazard ratio, or relative risk) will be  
24 reported (Table 2).  
25  
26  
27  
28  
29  
30  
31  
32  
33  
34  
35  
36  
37  
38  
39  
40  
41  
42  
43  
44

45 To summarize the level of evidence, the Scottish Intercollegiate Guidelines Network  
46 Methodology [29] will be utilized: (i) “++” when all or most of the quality criteria proposed by  
47 Hayden (2006) are fulfilled (allowing one “Partly” while appraising all potential sources of bias);  
48 (ii) “+” when some of the criteria are fulfilled; and (iii) “-” when few or none of the criteria are  
49 fulfilled (at least one “Yes”). Group (i) will be referred to as “high-quality studies” and group (ii)  
50 as “moderate-quality studies” (Table 2). Finally, the consistency of the level of evidence was  
51  
52  
53  
54  
55  
56  
57  
58  
59  
60

1  
2  
3 summarized. Evidence was designated “strong” when consistent findings were found in multiple  
4  
5 “good” or one or more “excellent” quality studies and the total sample size of combined eligible  
6  
7 studies was  $\geq 100$ ; “moderate” when consistent findings in multiple “fair” or one “good” quality  
8  
9 study with a total sample  $\geq 50$ , or at least one “good” or “excellent” quality study with a total  
10  
11 sample of 50-99; “limited” when findings were found in at least one “fair,” “good,” or  
12  
13 “excellent” quality study with total sample size between 25 and 49; and “unknown” when  
14  
15 findings were of indeterminate rating, in studies with poor methodological quality or with a  
16  
17 sample of  $< 25$ . [30]  
18  
19  
20  
21  
22

### 23 *Measurements: description and properties evaluation*

24  
25  
26  
27 Using a standardized form developed for a previous systematic review on measurements’  
28  
29 properties, [30] details of included measurements will be extracted from original studies and  
30  
31 manuals-- where available-- and studies that evaluated their psychometric properties. The  
32  
33 following descriptors will be extracted and reported: general characteristics, purpose and content,  
34  
35 method of administration, respondent burden, language (and translations), psychometric  
36  
37 properties, particularly reliability and construct validity, strength and caution for application in  
38  
39 persons with CNS trauma. [31] Measurements will be then categorized into the following groups:  
40  
41  
42 (i) global measures of cognition; (ii) domain-specific measures of cognition; and (iii) multi-  
43  
44 domain measures, which include items (subscales) of cognition among other functions. [32]  
45  
46  
47 Then, based on the above descriptors and using the Holmbeck et al. (2008) evidence-based  
48  
49 assessment criteria, [33] a rating will be assigned – “well-established assessment,” “approaching  
50  
51 well-established assessment,” or “promising assessment” in patients with CNS trauma-- to each  
52  
53 included measurement.  
54  
55  
56  
57  
58  
59  
60

1  
2  
3 Given the diversity in measurements of domains of cognitive function, severity and localization  
4 of CNS trauma, and the high likelihood of the diversity of statistical methodology used to  
5 express associations, a best-evidence synthesis approach [34] will be applied, synthesizing  
6 findings from studies with sufficient quality through tabulation and qualitative description. Some  
7 features falling under meta-analysis construct (i.e., sample size-weighted mean frequencies) will  
8 be considered only for the second research question (i.e., the course of cognitive deficits). As  
9 indicated above, for studies focusing on the same domain of cognitive deficits prevalence (i.e.,  
10 executive function, etc.), sample size-weighted mean frequencies will be collected and matching  
11 assessment times (i.e. time post-injury that each domain of the cognitive function was measured)  
12 will be grouped with their corresponding frequencies. A sample size-weighted mean frequency  
13 value will be calculated for time points with more than one contributing frequency value (i.e.  
14 more than one study reporting values at that time point post-injury).

### 32 *Dealing with missing data*

33  
34  
35  
36 Primary authors in cases of missing data will be contacted. The proportion of missing data will  
37 be reported along with reasons where indicated. In the case of duplicate publications and  
38 companion papers of a primary study, we will attempt to yield maximum scientific information  
39 by abstraction of all available data. Nonetheless, original publication (usually the oldest version)  
40 will take priority in data analysis.

### 49 **Ethics and dissemination**

50  
51  
52  
53 This systematic review will provide increased scientific certainty about the prognostic factors  
54 and natural history of cognitive deficits in patients with CNS trauma, informing clinicians,  
55  
56  
57  
58  
59  
60

1  
2  
3 policy makers, and subsequent studies funded by the Alzheimer's Association. The strength of  
4 this systematic review protocol and research program is in its methodology, making it possible  
5 to identify associations longitudinally, thus improving the quality of inductive inferences about  
6 the natural progression of cognitive status in patients with CNS trauma. The multilevel risk of  
7 bias assessment will allow researchers to detect main flaws in the individual studies' design and  
8 inform future research on the topic of cognition in CNS trauma. During the development phase  
9 of the project, concepts and hypotheses were formulated based on a synthesis of relevant  
10 discoveries across various disciplines and previous research. The need to pay special attention  
11 to measurements used to assess cognitive function in patients with CNS trauma is noted and  
12 researchers will consider reliability and construct validity of each measure. It is evident that the  
13 content of measurements and their psychometric properties can influence estimates of cognitive  
14 impairment across time points (i.e., natural history research aim) as well and predictors of  
15 cognition in patients with CNS trauma. Likewise, earlier research highlighted that different  
16 domains of cognition are affected differently in TBI and SCI based on the injury, localization,  
17 and severity and that the perception of a person with CNS trauma can also be influenced by the  
18 duration of cognitive impairment (ie, individuals could have adjusted to their long-term  
19 impairment, making them less likely to recognize their degree of impairment). To mitigate these  
20 issues, a variety of data related to domains of each measure will be collected and reported on.  
21 Such an approach will help researchers think about elements that constitute cognition in patients  
22 with CNS trauma, increasing the comprehensiveness of understanding and  
23 appreciation/relevance of measurement theory to the study of cognition. Further, the clinical  
24 criteria for the diagnoses of TBI and SCI will be collected and reported, as it is expected that  
25 they have a significant impact on the study results. Finally, multi-level knowledge translation  
26  
27  
28  
29  
30  
31  
32  
33  
34  
35  
36  
37  
38  
39  
40  
41  
42  
43  
44  
45  
46  
47  
48  
49  
50  
51  
52  
53  
54  
55  
56  
57  
58  
59  
60

1  
2  
3 activities throughout of this research activity will be performed, ensuring that these results reach  
4  
5 their intended knowledge users.  
6  
7

### 8 9 *Limitations*

10  
11  
12 Certain features of this review are open to debate. Those features include: (1) The assumption of  
13  
14 expected heterogeneity in the primary studies with respect to sample characteristics (i.e. age,  
15  
16 injury/localization of injury, time since injury) and the applied measurements of cognition  
17  
18 properties and content; (2) potentially unequal sex distribution in primary studies, given that  
19  
20 historically both TBI and SCI have been considered an injury of males; (3) age, a potential  
21  
22 predictor of cognitive decline, may not be always reported as a continuous variable or in similar  
23  
24 ranges; therefore, assessment of the age factor would be limited to those studies that reported it;  
25  
26 (4) baseline assessments of cognition in patients with CNS trauma is expected to vary between  
27  
28 studies: while the issue was predicted and attempts are to be made to mitigate the zero-time  
29  
30 effect by reporting results with baseline assessments up to one month post-injury and after one  
31  
32 month; separately, pre-morbid assessments of cognition are unlikely to be understood, and  
33  
34 therefore, the generalizability of the results may remain unclear due to inadequate control of the  
35  
36 confounding effects of premorbid cognitive functioning; (5) additional limitations relate to the  
37  
38 inclusion of only English language articles which could affect the relevance of our findings to  
39  
40 worldwide scientific community. Despite these limitations, this review is the first to consciously  
41  
42 and comprehensively synthesize evidence on cognitive status in patients with CNS trauma,  
43  
44 aiming to enrich science and advance care provided to patients with cognitive impairment  
45  
46 stemming from traumatic brain and spinal cord injuries.  
47  
48  
49  
50  
51  
52  
53  
54

### 55 56 *Implications*

1  
2  
3 An aging population will increase the burden of CNS trauma as the number of people surviving  
4 after the injury progressively increases. While the neurological consequences of CNS trauma are  
5 well described, evidence is emerging on sex-/age-dependent associations between a prior injury  
6 (most frequently TBI) and the development of senile Alzheimer's-type dementia many years  
7 later. Diagnostic criteria, first established by the National Institute of Neurological and  
8 Communicative Disorders and Stroke, were revised in light of the discovery of new markers--  
9 amyloid-B and tau proteins-- accumulation of which brings cognitive dysfunction and neuronal  
10 death. These markers, shown to be non-specific in Alzheimer's disease, appeared to be similar in  
11 persons with TBI and fatal familial insomnia. The reason behind these phenomena is not entirely  
12 clear. To fill the gap that is left by current evidence-based practice, the proposed study will lay  
13 the ground for further research aimed at determining the underlying basis behind any observed  
14 patterns. The significant economic and human costs of cognitive dysfunction years after CNS  
15 trauma merit the call for systematic efforts to understand the factors that contribute to its  
16 development. This research expects to motivate future investigations of AD and CNS trauma in  
17 numerous directions.  
18  
19  
20  
21  
22  
23  
24  
25  
26  
27  
28  
29  
30  
31  
32  
33  
34  
35  
36  
37  
38  
39

#### 40 **List of abbreviations**

41  
42  
43 CNS, central nervous system; PRISMA, Preferred Reporting Items for Systematic Reviews and  
44 Meta-Analyses; PROSPERO, International Prospective Register of Systematic Reviews; RCT,  
45 randomized control trial; SCI, spinal cord injury; TBI, traumatic brain injury.  
46  
47  
48  
49  
50

#### 51 **Competing interests**

52  
53  
54  
55 The authors have no conflicts of interest to declare pertaining to this research.  
56  
57  
58  
59  
60

### **Authors' contributions**

TM and AC contributed to the conception and design of the protocol. TM developed the idea, designed the protocol, and built the graphic data representation (e.g. tables, figure) AC provided expertise at each level and also reviewed the protocol. TM registered the protocol PROSPERO. TM wrote the first draft, which was reviewed by AC.

### **Funding sources**

This research program is supported by the postdoctoral research grant to TM from the Alzheimer's Association (AARF-16-442937). AC is supported by the Canadian Institutes for Health Research Grant–Institute for Gender and Health (#CGW-126580).

### **Acknowledgements**

We gratefully acknowledge the involvement of Ms. Jessica Babineau, information specialist at the Toronto Rehabilitation Institute for her help with the literature search.

### **Data sharing statement**

Unpublished data from this study will be available will be shared with scientific/research community via Dryad digital repository ([datadryad.org](http://datadryad.org)).

1  
2  
3 **Additional material**  
4  
5  
6

7 File name: Additional file 1  
8  
9

10 File format: additional file 1.docx  
11  
12

13  
14 Title of data: Search strategies.  
15  
16

17  
18 Description of data: This file provides the list of search terms used to  
19 search Medline, Central, Embase, Scopus, PsycINFO, and supplemental  
20 PubMed.  
21  
22  
23  
24  
25  
26  
27  
28  
29  
30  
31  
32  
33  
34  
35  
36  
37  
38  
39  
40  
41  
42  
43  
44  
45  
46  
47  
48  
49  
50  
51  
52  
53  
54  
55  
56  
57  
58  
59  
60



## References

1. Valenzuela V, Oñate M, Hetz C, Court FA. Injury to the nervous system: A look into the ER. *Brain Res.* 2016;1648(Pt B):617-25.
2. Phillips AA, Squair JR, Currie KD, Tzeng YC, Ainslie PN, Krassioukov AV. 2015 ParaPan American Games: Autonomic Function, But Not Physical Activity, Is Associated with Vascular-Cognitive Impairment in Spinal Cord Injury. *J Neurotrauma.* 2017 doi: 10.1089/neu.2016.4751. [Epub ahead of print].
3. Wu J, Zhao Z, Kumar A, Lipinski MM, Loane DJ, Stoica BA, Faden AI. Endoplasmic Reticulum Stress and Disrupted Neurogenesis in the Brain Are Associated with Cognitive Impairment and Depressive-Like Behavior after Spinal Cord Injury. *J Neurotrauma.* 2016;33(21):1919-1935.
4. Muccigrosso MM, Ford J, Benner B, Moussa D, Burnsides C, Fenn AM, Popovich PG, Lifshitz J, Walker FR, Eiferman DS, Godbout JP. Cognitive deficits develop 1month after diffuse brain injury and are exaggerated by microglia-associated reactivity to peripheral immune challenge. *Brain Behav Immun.* 2016;54:95-109.
5. Nott MT, Baguley IJ, Heriseanu R, Weber G, Middleton JW, Meares S, Batchelor J, Jones A, Boyle CL, Chilko S. Effects of concomitant spinal cord injury and brain injury on medical and functional outcomes and community participation. *Top Spinal Cord Inj Rehabil.* 2014;20(3):225-35.
6. LoBue C, Wadsworth H, Wilmoth K, Clem M, Hart J Jr, Womack KB, Didehbani N, Lacritz LH, Rossetti HC, Cullum CM. Traumatic brain injury history is associated with earlier age of onset of Alzheimer disease. *Clin Neuropsychol.* 2017;31(1):85-98.

- 1  
2  
3  
4  
5  
6  
7  
8  
9  
10  
11  
12  
13  
14  
15  
16  
17  
18  
19  
20  
21  
22  
23  
24  
25  
26  
27  
28  
29  
30  
31  
32  
33  
34  
35  
36  
37  
38  
39  
40  
41  
42  
43  
44  
45  
46  
47  
48  
49  
50  
51  
52  
53  
54  
55  
56  
57  
58  
59  
60
7. Collins-Praino LE, Corrigan F. Does neuroinflammation drive the relationship between tau hyperphosphorylation and dementia development following traumatic brain injury? *Brain Behav Immun*. 2017;60:369-382.
8. Nordström P, Michaëlsson K, Gustafson Y, Nordström A. Traumatic brain injury and young onset dementia: a nationwide cohort study. *Ann Neurol*. 2014;75(3):374-81.
9. Li Y, Li Y, Li X, Zhang S, Zhao J, Zhu X, Tian G. Head injury as a risk factor for demential and Alzheimer's disease : A systematic review and meta-analysis of 32 observational studies. *PlosS One*. 2017; 12 (1):e0169650.
10. Wecht JM, Bauman WA. Decentralized cardiovascular autonomic control and cognitive deficits in persons with spinal cord injury. *J Spinal Cord Med*. 2013;36(2):74-81.
11. Himanen L, Portin R, Isoniemi H, Helenius H, Kurki T, Tenovuo O. Longitudinal cognitive changes in traumatic brain injury: a 30-year follow-up study. *Neurology*. 2006;66(2):187-92.
12. Craig A, Nicholson Perry K, Guest R, Tran Y, Dezarnaulds A, Hales A, Ephraums C, Middleton J. Prospective study of the occurrence of psychological disorders and comorbidities after spinal cord injury. *Arch Phys Med Rehabil*. 2015;96(8):1426-34.
13. deVet CHW, Terwee CB, Mokkink LB, Knol DL. *Measurements in Medicine. A Practical Guide*. Cambridge University Press 2011.
14. Monsell SE, Liu D, Weintraub S, Kukull WA. Comparing measures of decline to dementia in amnesic MCI subjects in the National Alzheimer's Coordinating Center (NACC) Uniform Data Set. *Int Psychogeriatr*. 2012;24(10):1553-60.
15. Guyatt GH, Kirshner B, Jaeschke R. Measuring health status: what are the necessary properties? *J Clin Epidemiol*. 1992; 12: 1341-5.

- 1  
2  
3 16. Feigin VL, Theadom A, Barker-Collo S, Starkey NJ, McPherson K, Kahan M, Dowell A,  
4  
5 Brown P, Parag V, Kydd R, Jones K, Jones A, Ameratunga S; BIONIC Study Group..  
6  
7 Incidence of traumatic brain injury in New Zealand: a population-based study. *Lancet*  
8  
9 *Neurol.* 2013;12(1):53-64.
- 10  
11  
12 17. Hagen EM, Rekand T, Gilhus NE, Grønning M. Traumatic spinal cord injuries--incidence,  
13  
14 mechanisms and course. *Tidsskr Nor Laegeforen.* 2012;132(7):831-7.
- 15  
16  
17 18. Canadian Institutes of Health Research. 2015. Definitions of Sex and Gender. Retrieved  
18  
19 March 17, 2017. <<http://www.cihr-irsc.gc.ca/e/47830.html>>
- 20  
21  
22 19. Mielke MM, Vemuri P, Rocca WA. Clinical epidemiology of Alzheimer's disease: assessing  
23  
24 sex and gender differences. *Clin Epidemiol.* 2014;6:37-48.
- 25  
26  
27 20. Vahaba DM, Ramage-Healey L. Brain estrogen production and the encoding of recent  
28  
29 experience. *Curr Opin Behav Sci.* 2015;6:148-153.
- 30  
31  
32 21. Li R, Cui J, Shen Y. Brain sex matters: estrogen in cognition and Alzheimer's disease. *Mol*  
33  
34 *Cell Endocrinol.* 2014 May 25;389(1-2):13-21
- 35  
36  
37 22. Lipnicki DM, Crawford JD, Dutta R, et al.; Cohort Studies of Memory in an International  
38  
39 Consortium (COSMIC). Age-related cognitive decline and associations with sex, education  
40  
41 and apolipoprotein E genotype across ethnocultural groups and geographic regions: a  
42  
43 collaborative cohort study. *PLoS Med.* 2017;14(3):e1002261.
- 44  
45  
46 23. Mollayeva T, Kendzerska T, Mollayeva S, Colantonio A. Sleep apnea after traumatic brain  
47  
48 injury: understanding the impact on executive functioning. *J Sleep Disorders: Treat Care*  
49  
50 2013; 2:5.
- 51  
52  
53 24. Moher D, Liberati A, Tetzlaff J, Altman DG. Preferred reporting items for systematic  
54  
55 reviews and meta-analyses for PRISMA statement. *PLoS medicine.* 2009; 6(7).
- 56  
57  
58  
59  
60

- 1  
2  
3  
4  
5  
6  
7  
8  
9  
10  
11  
12  
13  
14  
15  
16  
17  
18  
19  
20  
21  
22  
23  
24  
25  
26  
27  
28  
29  
30  
31  
32  
33  
34  
35  
36  
37  
38  
39  
40  
41  
42  
43  
44  
45  
46  
47  
48  
49  
50  
51  
52  
53  
54  
55  
56  
57  
58  
59  
60
25. PROSPERO- International Prospective Register of Systematic Reviews.  
[<http://www.crd.york.ac.uk/prospero/>].
  26. Andringa TC, Bosch KA, Wijermans N. Cognition from life: the two modes of cognition that underlie moral behavior. *Front Psychol.* 2015;6:362.
  27. American Psychiatric Association. Diagnostic and statistical manual of mental disorders. 5th ed. Washington, DC: American Psychiatric Association, 2013.
  28. Hayden JA, Cote P, Bombardier C. Evaluation of the quality of prognosis studies in systematic reviews. *Ann Intern Med* 2006;144(6):427-37.
  29. Scottish Intercollegiate Guidelines Network. Published Guidelines\_ Assessed on February 15 2017 at: [www.sign.ac.uk/guidelines/](http://www.sign.ac.uk/guidelines/).
  30. van Tulder M, Furlan A, Bombardier C, Bouter L, Editorial Board of the Cochrane Collaboration Back Review Group. *Spine (Phila Pa 1976)* 2003; 28: 1290-9.
  31. Mollayeva T, Kendzerska T, Colantonio A. Self-report instruments for assessing sleep dysfunction in an adult traumatic brain injury population: a systematic review. *Sleep Med Rev.* 2013;17(6):411-23.
  32. Wesson J, Clemson L, Brodaty H, Reppermund S. Estimating functional cognition in older adults using observational assessments of task performance in complex everyday activities: A systematic review and evaluation of measurement properties. *Neurosci Biobehav Rev.* 2016; 68:335-60.
  33. Holmbeck GN, Thill AW, Bachanas P, Garber J, Miller KB, Abad M, Bruno EF, Carter JS, David-Ferdon C, Jandasek B, Mennuti-Washburn JE, O'Mahar K, Zukerman J. Evidence-based assessment in pediatric psychology: measures of psychosocial adjustment and psychopathology. *J Pediatr Psychol.* 2008;33(9):958-80.

1  
2  
3  
4  
5  
6  
7  
8  
9  
10  
11  
12  
13  
14  
15  
16  
17  
18  
19  
20  
21  
22  
23  
24  
25  
26  
27  
28  
29  
30  
31  
32  
33  
34  
35  
36  
37  
38  
39  
40  
41  
42  
43  
44  
45  
46  
47  
48  
49  
50  
51  
52  
53  
54  
55  
56  
57  
58  
59  
60

34. Slavin RE. Best evidence synthesis: an intelligent alternative to meta-analysis. J Clin Epidemiol. 1995;48(1):9-18.

For peer review only

Table 1. Summary of study characteristics, including details on study sample, design, methods and results pertaining to cognitive status in patients with CNS trauma.

| Author (year),<br>Journal,<br>Country, Setting | (1) Objective<br>(2) Design<br>(3) Follow<br>up/assessment times<br>(4)<br>Inclusion/exclusion<br>criteria | (1) Sample size<br>(2) Attrition<br>(3) Age (mean (SD)/ range), yrs<br>(4) Sex (%M)<br>(5) Education<br>(6) Socioeconomic status<br>(7) Injury severity (IS)<br>(8) Time since injury (TSI)<br>(9) Injury localization (IL)<br>(10) Assessment time points/N<br>assessed (AT: t <sub>1</sub> , t <sub>2</sub> , etc.) | Statistical<br>method | Confounders<br>(1) Medications<br>(2) Comorbidities/<br>measures<br>(3) Others | Results                                                                                                |                                         |
|------------------------------------------------|------------------------------------------------------------------------------------------------------------|-----------------------------------------------------------------------------------------------------------------------------------------------------------------------------------------------------------------------------------------------------------------------------------------------------------------------|-----------------------|--------------------------------------------------------------------------------|--------------------------------------------------------------------------------------------------------|-----------------------------------------|
|                                                |                                                                                                            |                                                                                                                                                                                                                                                                                                                       |                       |                                                                                | (1) Cognitive status<br>definition<br>(domain)<br>(2) Frequencies,<br>scores, cut-off<br>score, if any | Score differences<br>over time<br>Notes |
|                                                |                                                                                                            |                                                                                                                                                                                                                                                                                                                       |                       |                                                                                |                                                                                                        |                                         |

1  
2  
3  
4  
5  
6  
7  
8  
9  
10  
11  
12  
13  
14  
15  
16  
17  
18  
19  
20  
21  
22  
23  
24  
25  
26  
27  
28  
29  
30  
31  
32  
33  
34  
35  
36  
37  
38  
39  
40  
41  
42  
43  
44  
45  
46  
47  
48  
49

Table 2. Quality assessment of included studies using guidelines developed by Hayden et al, 2006.

| N | Study | Study participation | Time-Zero | Study attrition | Prognostic factor | Outcome | Confounding measurement and account | Analysis | Reason for exclusion | Overall Assessment |
|---|-------|---------------------|-----------|-----------------|-------------------|---------|-------------------------------------|----------|----------------------|--------------------|
| 1 |       |                     |           |                 |                   |         |                                     |          |                      |                    |

Yes – yes, sources of potential bias are presented

No – no potential bias

Not sure – not enough details were reported to make a decision (in some cases authors were contacted)

NA - not applicable according to the study design or type of analyses used

<sup>a</sup> – Not all required information about study attrition was provided

<sup>b</sup> - A study does not address the possibility of confounding

<sup>c</sup> – Some errors in analyses performed were observed: e.g. limited details about analyses

<sup>d</sup> – Completeness of follow-up was not adequate

<sup>e</sup> – Small sample size

<sup>f</sup> – Detail information about measure used was not provided or used measure was not validated

<sup>g</sup> – Analyses performed were not adequate

<sup>h</sup> – Not all important covariates were included or exclusion criteria are not completed

<sup>i</sup> – Baseline assessment performed after 1 month post injury

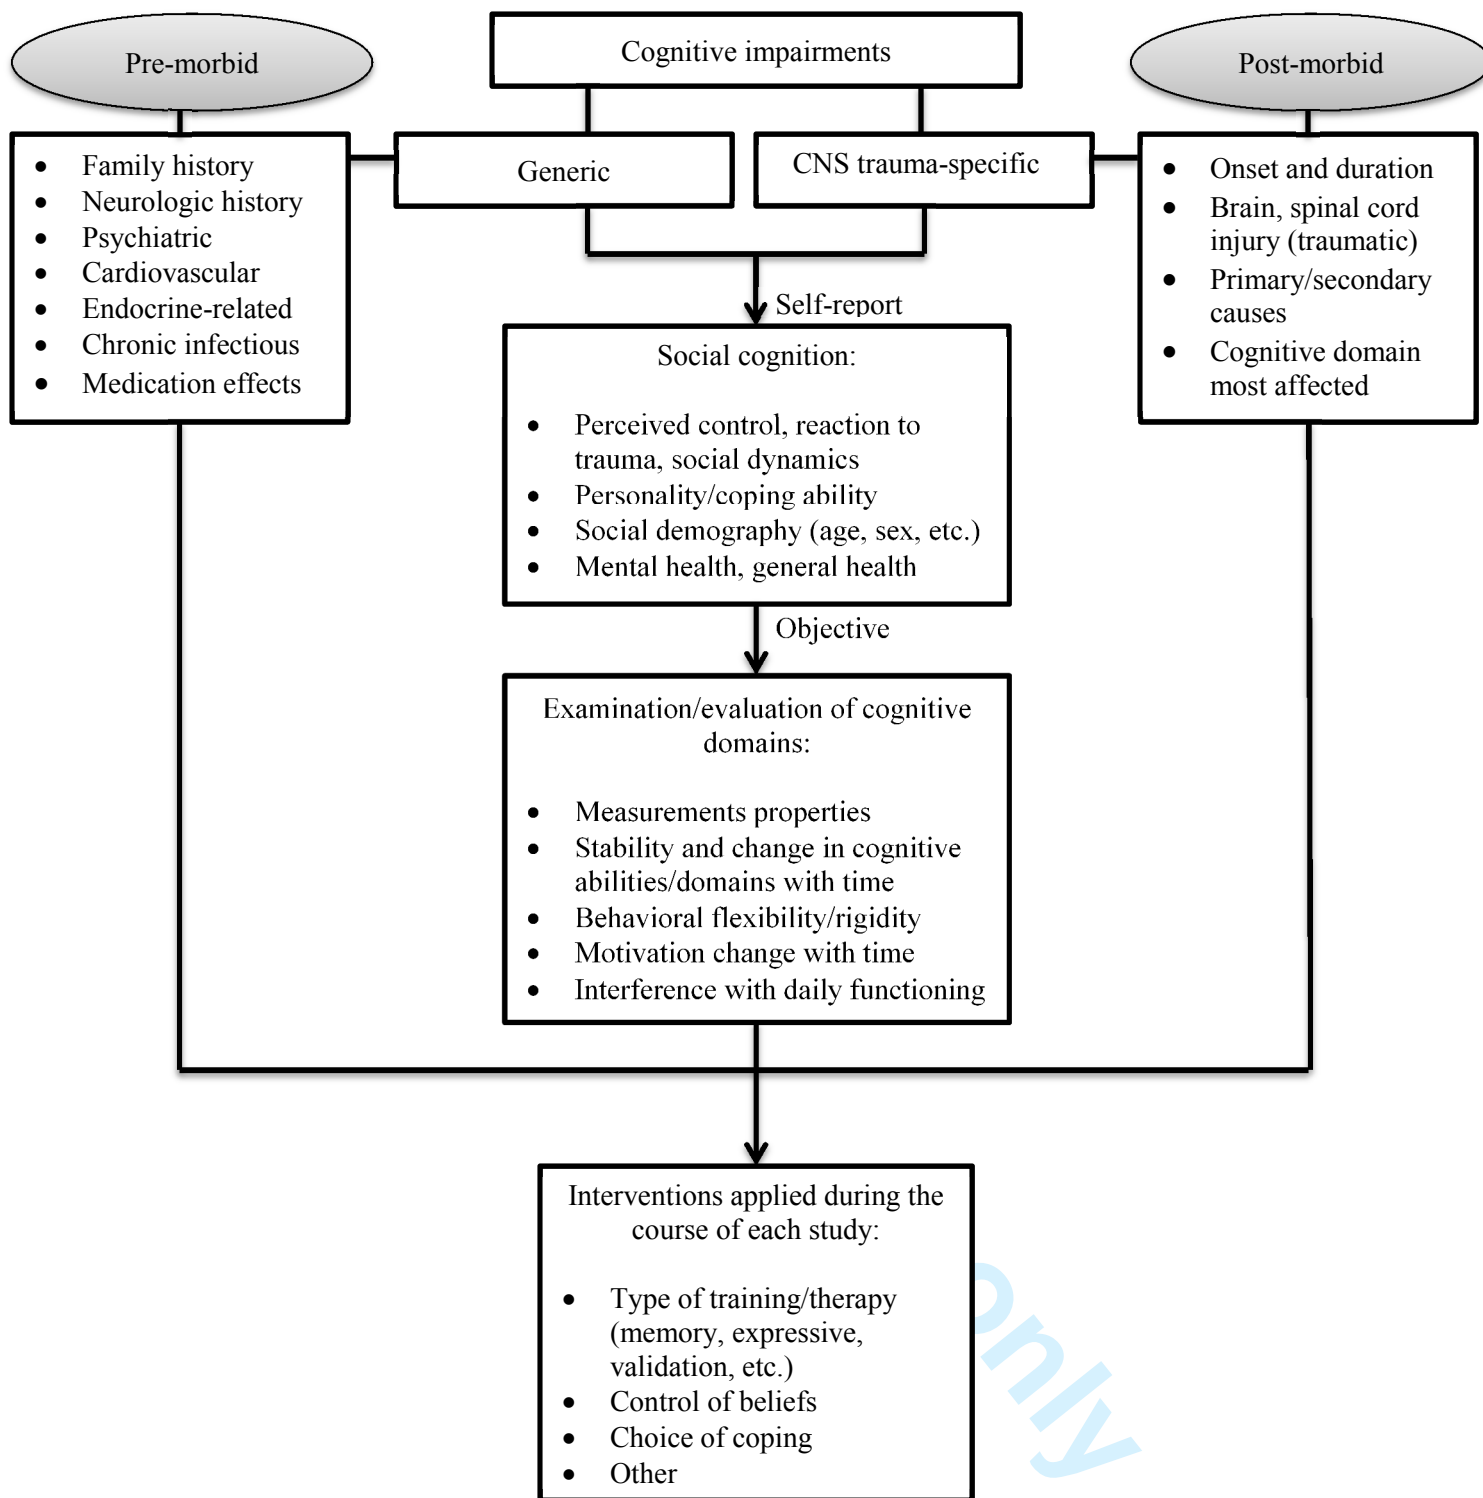

Figure 1. Conceptual model for summarizing longitudinal evidence on cognitive status in patients after central nervous system (CNS) trauma (i.e., traumatic brain injury (TBI), traumatic spinal cord injury (SCI) or both)



## SEARCH DETAILS

Searches conducted in Medline and Medline in-process, Embase, Cochrane Central Register of Controlled Trials, PsycINFO. A supplemental search was conducted in Pubmed to identify non-Medline records. All searches were conducted from inception of the database to December 2016. All searches were limited to English. Searches were conducted by an Information Specialist (JB).

## PRE-DUPLICATE REMOVAL

TOTAL Results: 29564

Medline: 9214

Embase: 12609

Central: 1135

PsycINFO: 2504

Scopus: 3267

Supplemental Pubmed search for NON-MEDLINE results: 835

| Category            | Count   | Reference Count |
|---------------------|---------|-----------------|
| All References      | (29564) | 30748           |
| Imported References | (35)    | 30434           |
| Unfiled             | (0)     | 30326           |
| Trash               | (1264)  | 30374           |
| My Groups           |         | 30622           |
| CENTRAL_2016.12.01  | (1135)  | 30675           |
| Embase_2016.12.01   | (12609) | 30167           |
| Medline_2016.12.01  | (9214)  | 30440           |
| PsycINFO_2016.12.02 | (2504)  | 30214           |
| Pubmed_2016.12.05   | (835)   | 30381           |
| SCOPUS_2016.12.02   | (3267)  | 30494           |
| Find Full Text      |         | 30791           |
|                     |         | 30173           |
|                     |         | 30428           |
|                     |         | 30413           |
|                     |         | 30641           |

## POST-QUICK DUPLICATE REMOVAL

TOTAL Results: 22654

Duplicates Removed: 6910

Medline: 8197

Embase: 11557

Central: 354

PsycINFO: 882

Scopus: 1213

Supplemental Pubmed search for NON-MEDLINE results: 451

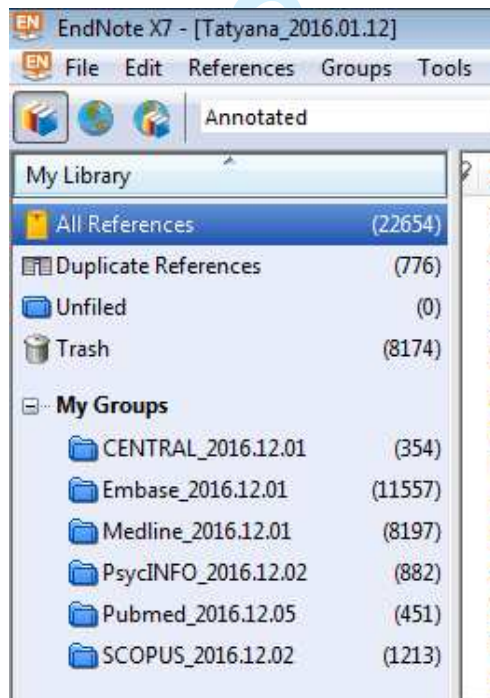

## SEARCH STRATEGIES

Epub Ahead of Print, In-Process & Other Non-Indexed Citations, Ovid

MEDLINE(R) Daily and Ovid MEDLINE(R) <1946 to Present>

Search Strategy:

- 
- 1 exp brain injuries/ (62019)
  - 2 Craniocerebral Trauma/ (21460)
  - 3 exp Head Injuries, Closed/ (9310)
  - 4 exp Skull Fractures/ (20416)
  - 5 mTBI\*2.tw. (1804)

1  
2  
3  
4  
5  
6  
7  
8  
9  
10  
11  
12  
13  
14  
15  
16  
17  
18  
19  
20  
21  
22  
23  
24  
25  
26  
27  
28  
29  
30  
31  
32  
33  
34  
35  
36  
37  
38  
39  
40  
41  
42  
43  
44  
45  
46  
47  
48  
49  
50  
51  
52  
53  
54  
55  
56  
57  
58  
59  
60

6 tbi\*2.tw. (21603)

7 concuss\*.tw. (6210)

8 ((head\* or cerebr\* or crani\* or capitis\* or brain\* or forebrain\* or skull\* or hemispher\* or  
intracran\* or orbit\*) adj2 (injur\* or trauma\* or lesion\* or damag\* or wound\* or destruction\* or  
swell\* or oedema\* or edema\* or fracture\* or contusion\* or commotion\* or pressur\*).tw. (175759)

9 ((brain\* or cerebr\* or intracerebr\* or crani\* or intracran\* or head\* or subarachnoid\* or  
subdural\* or epidural\* or extradural\*) adj (haematoma\* or hematoma\* or hemorrhag\* or  
haemorrhag\* or pressur\* or bleed\*).tw. (76211)

10 or/1-9 (270610)

11 exp Spinal Cord Injuries/ (44778)

12 exp Central Cord Syndrome/ (83)

13 (myelopathy adj3 (traumatic or post-traumatic)).tw,kw. (98)

14 ((spine or spinal) adj3 (fracture\* or wound\* or trauma\* or injur\* or damag\*).tw,kw. (49823)

15 (spinal cord adj3 (contusion\* or laceration\* or transaction\* or trauma\* or ischemi\*).tw,kw.  
(7108)

16 SCI.tw,kw. (30348)

17 exp Paraplegia/ (12903)

18 exp Quadriplegia/ (7861)

19 (paraplegia\* or quadriplegia\* or tetraplegia\*).tw,kw. (16952)

20 Spinal Cord Compression/ (10657)

21 exp Cervical Vertebrae/in (7544)

22 central spinal cord syndrome.tw,kw. (10)

23 central cord injury syndrome.tw,kw. (1)

24 or/11-23 (108760)

25 Brain Death/ (8074)

26 (brain adj2 (death or dead)).tw,kw. (7913)

27 ((vegetat\* or unawareness\* or "minimally conscious") adj2 state\*1).tw,kw. (3285)

28 (prolonged adj2 unawareness\*).tw,kw. (10)

29 25 or 26 or 27 or 28 (14590)

30 (central nervous system adj2 trauma\*).tw,kw. (334)

31 (CNS adj2 trauma\*).tw,kw. (529)

32 10 or 24 or 29 or 30 or 31 (384413)

33 exp Cognition/ (142070)

34 exp Cognition Disorders/ (85970)

35 neurocognit\*.tw,kw. (17260)

36 (cognitive or cognition).tw,kw. (316220)

37 Executive Function/ (10349)

- 1  
2  
3  
4 38 (executive adj2 (function\* or control\*).tw,kw. (23269)  
5 39 exp Arousal/ (114735)  
6 40 arous\*.tw,kw. (32131)  
7  
8 41 attention\*.tw,kw. (343363)  
9  
10 42 vigilan\*.tw,kw. (17025)  
11 43 or/33-42 (818304)  
12 44 32 and 43 (29440)  
13 45 (dementi\* or alzhem\*).tw,kw. (188105)  
14 46 exp dementia/ (154811)  
15 47 45 or 46 (227210)  
16 48 32 and 47 (8285)  
17 49 exp clinical trial/ (816969)  
18 50 exp Clinical Trials as Topic/ (323082)  
19 51 multicenter studies as topic/ (17817)  
20 52 (randomi?ed adj7 trial\*).tw,kw. (309575)  
21 53 (controlled adj3 trial\*).tw,kw. (213828)  
22 54 (clinical adj2 trial\*).tw,kw. (309587)  
23 55 ((single or doubl\* or tripl\* or treb\*) and (blind\* or mask\*)).tw,kw. (174728)  
24 56 ("4 arm" or "four arm").tw,kw. (928)  
25 57 or/49-56 (1341652)

26  
27  
28  
29  
30  
31  
32  
33 Annotation: Clinical trial SOURCE:

34 [http://libguides.sph.uth.tmc.edu/search\\_filters/ovid\\_medline\\_filters](http://libguides.sph.uth.tmc.edu/search_filters/ovid_medline_filters)

- 35  
36 58 Case-Control Studies/ (250991)  
37 59 Control Groups/ (1791)  
38 60 Matched-Pair Analysis/ (4926)  
39 61 retrospective studies/ (643251)  
40 62 ((case\* adj5 control\*) or (case adj3 comparison\*) or control group\*).tw,kw. (528797)  
41 63 or/58-62 (1282282)

42  
43  
44  
45 Annotation: Case control SOURCE:

46 [http://libguides.sph.uth.tmc.edu/search\\_filters/ovid\\_medline\\_filters](http://libguides.sph.uth.tmc.edu/search_filters/ovid_medline_filters)

- 47 64 cohort studies/ (233586)  
48 65 longitudinal studies/ (120931)  
49 66 follow-up studies/ (595123)  
50 67 prospective studies/ (464936)  
51 68 cohort.tw,kw. (404386)  
52 69 longitudinal.tw,kw. (206890)  
53 70 prospective.tw,kw. (477259)  
54  
55  
56  
57  
58  
59  
60

1  
2  
3  
4 71 retrospective.tw,kw. (391544)

5 72 or/64-71 (1958903)

6 Annotation: Cohort source: [http://libguides.sph.uth.tmc.edu/search\\_filters/ovid\\_medline\\_filters](http://libguides.sph.uth.tmc.edu/search_filters/ovid_medline_filters)

7  
8 73 controlled before-after studies/ or interrupted time series analysis/ (462)

9  
10 74 57 or 63 or 72 or 73 (3688853)

11 75 44 and 74 (8776)

12 76 48 and 74 (1798)

13 77 75 or 76 (9756)

14 78 limit 77 to english language (9214)

15  
16  
17  
18 \*\*\*\*\*

19  
20  
21 **Cochrane Central Register of Controlled Trials** <October 2016>

22 Search Strategy:

23 -----  
24  
25  
26 1 exp brain injuries/ (1087)

27 2 Craniocerebral Trauma/ (244)

28 3 exp Head Injuries, Closed/ (156)

29 4 exp Skull Fractures/ (178)

30 5 mTBI\*2.tw. (85)

31 6 tbi\*2.tw. (1060)

32 7 concuss\*.tw. (147)

33 8 ((head\* or cerebr\* or crani\* or capitis\* or brain\* or forebrain\* or skull\* or hemispher\* or  
34 intracran\* or orbit\*) adj2 (injur\* or trauma\* or lesion\* or damag\* or wound\* or destruction\* or  
35 swell\* or oedema\* or edema\* or fracture\* or contusion\* or commotion\* or pressur\*).tw. (5744)

36 9 ((brain\* or cerebr\* or intracerebr\* or crani\* or intracran\* or head\* or subarachnoid\* or  
37 subdural\* or epidural\* or extradural\*) adj (haematoma\* or hematoma\* or hemorrhag\* or  
38 haemorrhag\* or pressur\* or bleed\*).tw. (4083)

39 10 or/1-9 (9638)

40 11 exp Spinal Cord Injuries/ (881)

41 12 exp Central Cord Syndrome/ (0)

42 13 (myelopathy adj3 (traumatic or post-traumatic)).tw,kw. (1)

43 14 ((spine or spinal) adj3 (fracture\* or wound\* or trauma\* or injur\* or damag\*)).tw,kw. (2155)

44 15 (spinal cord adj3 (contusion\* or laceration\* or transaction\* or trauma\* or ischemi\*)).tw,kw.  
45 (144)

46 16 SCI.tw,kw. (840)

1  
2  
3  
4 17 exp Paraplegia/ (164)  
5 18 exp Quadriplegia/ (142)  
6 19 (paraplegia\* or quadriplegia\* or tetraplegia\*).tw,kw. (355)  
7  
8 20 Spinal Cord Compression/ (77)  
9  
10 21 exp Cervical Vertebrae/in (3)  
11 22 central spinal cord syndrome.tw,kw. (1)  
12 23 central cord injury syndrome.tw,kw. (0)  
13  
14 24 or/11-23 (2772)  
15 25 Brain Death/ (46)  
16  
17 26 (brain adj2 (death or dead)).tw,kw. (158)  
18 27 ((vegetat\* or unawareness\* or "minimally conscious") adj2 state\*1).tw,kw. (89)  
19  
20 28 (prolonged adj2 unawareness\*).tw,kw. (0)  
21 29 25 or 26 or 27 or 28 (254)  
22  
23 30 (central nervous system adj2 trauma\*).tw,kw. (1)  
24 31 (CNS adj2 trauma\*).tw,kw. (3)  
25  
26 32 10 or 24 or 29 or 30 or 31 (12479)  
27  
28 33 exp Cognition/ (7913)  
29 34 exp Cognition Disorders/ (3101)  
30 35 neurocognit\*.tw,kw. (1356)  
31 36 (cognitive or cognition).tw,kw. (31319)  
32  
33 37 Executive Function/ (529)  
34 38 (executive adj2 (function\* or control\*)).tw,kw. (2114)  
35  
36 39 exp Arousal/ (7319)  
37 40 arous\*.tw,kw. (3311)  
38 41 attention\*.tw,kw. (14257)  
39 42 vigilan\*.tw,kw. (1569)  
40  
41 43 or/33-42 (51427)  
42 44 32 and 43 (1263)  
43  
44 45 (dementi\* or alzhem\*).tw,kw. (8989)  
45  
46 46 exp dementia/ (3609)  
47 47 45 or 46 (9451)  
48 48 32 and 47 (142)  
49 49 44 or 48 (1328)  
50  
51 50 limit 49 to english language (1135)  
52  
53  
54  
55  
56 \*\*\*\*\*  
57  
58  
59  
60

**Embase** <1974 to 2016 November 30>

## Search Strategy:

- 
- 1 exp brain injury/ (158616)
  - 2 head injury/ (47431)
  - 3 mTBI\*2.tw. (2626)
  - 4 tbi\*2.tw. (31097)
  - 5 concuss\*.tw. (7222)
  - 6 ((head\* or cerebr\* or crani\* or capitis\* or brain\* or forebrain\* or skull\* or hemispher\* or intracran\* or orbit\*) adj2 (injur\* or trauma\* or lesion\* or damag\* or wound\* or destruction\* or swell\* or oedema\* or edema\* or fracture\* or contusion\* or commotion\* or pressur\*)).tw. (215012)
  - 7 ((brain\* or cerebr\* or intracerebr\* or crani\* or intracran\* or head\* or subarachnoid\* or subdural\* or epidural\* or extradural\*) adj (haematoma\* or hematoma\* or hemorrhag\* or haemorrhag\* or pressur\* or bleed\*)).tw. (97349)
  - 8 or/1-7 (357773)
  - 9 exp spinal cord injury/ (66659)
  - 10 spinal cord ischemia/ (3451)
  - 11 (myelopathy adj3 (traumatic or post-traumatic)).tw. (113)
  - 12 ((spine or spinal) adj3 (fracture\* or wound\* or trauma\* or injur\* or damag\*)).tw. (59117)
  - 13 (spinal cord adj3 (contusion\* or laceration\* or transaction\* or trauma\* or ischemi\*)).tw. (8264)
  - 14 SCI.tw. (37297)
  - 15 paraplegia/ (21869)
  - 16 quadriplegia/ (15330)
  - 17 (paraplegia\* or quadriplegia\* or tetraplegia\*).tw. (19145)
  - 18 central spinal cord syndrome.tw. (8)
  - 19 central cord injury syndrome.tw. (1)
  - 20 or/9-19 (136685)
  - 21 brain death/ (12613)
  - 22 (brain adj2 (death or dead)).tw. (10828)
  - 23 ((vegetat\* or unawareness\* or "minimally conscious") adj2 state\*1).tw. (4046)
  - 24 (prolonged adj2 unawareness\*).tw. (12)
  - 25 21 or 22 or 23 or 24 (19386)
  - 26 (central nervous system adj2 trauma\*).tw. (360)
  - 27 (CNS adj2 trauma\*).tw. (602)
  - 28 8 or 20 or 25 or 26 or 27 (499222)

1  
2  
3  
4 29 exp cognition/ (1941327)  
5 30 cognitive defect/ (138285)  
6 31 neurocognit\*.tw. (21396)  
7  
8 32 (cognitive or cognition).tw. (380936)  
9  
10 33 executive function/ (26536)  
11 34 (executive adj2 (function\* or control\*)).tw. (28576)  
12  
13 35 arousal/ (41038)  
14 36 arouse\*.tw. (38982)  
15 37 attention\*.tw. (399204)  
16  
17 38 vigilan\*.tw. (21941)  
18 39 or/29-38 (2408211)  
19  
20 40 exp dementia/ (300566)  
21 41 (dementi\* or alzhem\*).tw. (224692)  
22  
23 42 40 or 41 (323799)  
24 43 39 or 42 (2608334)  
25  
26 44 28 and 43 (96287)  
27  
28 45 exp clinical trial/ (1281583)  
29 46 exp "clinical trial (topic)"/ (267609)  
30 47 (randomi?ed adj7 trial\*).tw. (373380)  
31 48 (controlled adj3 trial\*).tw. (250872)  
32 49 (clinical adj2 trial\*).tw. (384066)  
33 50 ((single or doubl\* or tripl\* or treb\*) and (blind\* or mask\*)).tw. (219774)  
34 51 ("4 arm" or "four arm").tw. (1207)  
35 52 exp case control study/ (140524)  
36 53 control group/ (263620)  
37 54 clinical study/ or retrospective study/ (765384)  
38 55 ((case\* adj5 control\*) or (case adj3 comparison\*) or control group\*).tw. (668069)  
39 56 cohort analysis/ (303792)  
40 57 longitudinal study/ (106182)  
41 58 follow up/ (1232689)  
42 59 prospective study/ (388763)  
43 60 cohort.tw. (568512)  
44 61 longitudinal.tw. (231900)  
45 62 prospective.tw. (629993)  
46 63 retrospective.tw. (576605)  
47 64 or/45-63 (4750710)  
48 65 44 and 64 (27389)  
49  
50  
51  
52  
53  
54  
55  
56  
57  
58  
59  
60



1  
2  
3  
4 66 limit 65 to english language (26109)

5 67 limit 66 to embase (12609)

6 \*\*\*\*\*

7  
8  
9  
10 **PsycINFO** <1806 to November Week 4 2016>

11 Search Strategy:

12 -----  
13  
14 1 exp traumatic brain injury/ (15045)

15 2 exp head injuries/ (5474)

16 3 mTBI\*2.tw. (1222)

17 4 tbi\*2.tw. (8250)

18 5 concuss\*.tw. (2204)

19 6 ((head\* or cerebr\* or crani\* or capitis\* or brain\* or forebrain\* or skull\* or hemispher\* or  
20 intracran\* or orbit\*) adj2 (injur\* or trauma\* or lesion\* or damag\* or wound\* or destruction\* or  
21 swell\* or oedema\* or edema\* or fracture\* or contusion\* or commotion\* or pressur\*).tw. (50900)

22 7 ((brain\* or cerebr\* or intracerebr\* or crani\* or intracran\* or head\* or subarachnoid\* or  
23 subdural\* or epidural\* or extradural\*) adj (haematoma\* or hematoma\* or hemorrhag\* or  
24 haemorrhag\* or pressur\* or bleed\*).tw. (4816)

25 8 or/1-7 (55142)

26 9 exp spinal cord injuries/ (4891)

27 10 exp Spinal Cord/ and exp Ischemia/ (63)

28 11 (myelopathy adj3 (traumatic or post-traumatic)).tw. (7)

29 12 ((spine or spinal) adj3 (fracture\* or wound\* or trauma\* or injur\* or damag\*).tw. (5852)

30 13 (spinal cord adj3 (contusion\* or laceration\* or transaction\* or trauma\* or ischemi\*).tw. (848)

31 14 SCI.tw. (3541)

32 15 paraplegia/ (534)

33 16 quadriplegia/ (188)

34 17 (paraplegia\* or quadriplegia\* or tetraplegia\*).tw. (1302)

35 18 central spinal cord syndrome.tw. (0)

36 19 central cord injury syndrome.tw. (0)

37 20 or/9-19 (9003)

38 21 (brain adj2 (death or dead)).tw. (581)

39 22 ((vegetat\* or unawareness\* or "minimally conscious") adj2 state\*1).tw. (1069)

40 23 (prolonged adj2 unawareness\*).tw. (2)

41 24 21 or 22 or 23 (1611)

42 25 (central nervous system adj2 trauma\*).tw. (56)

1  
2  
3  
4 26 (CNS adj2 trauma\*).tw. (112)  
5 27 8 or 20 or 24 or 25 or 26 (64469)  
6 28 cognition/ (26647)  
7  
8 29 cognitive impairment/ (29197)  
9  
10 30 neurocognit\*.tw. (11048)  
11 31 (cognitive or cognition).tw. (385119)  
12 32 exp executive function/ (11055)  
13 33 (executive adj2 (function\* or control\*)).tw. (21794)  
14 34 physiological arousal/ (6451)  
15 35 exp attention/ (59769)  
16 36 arous\*.tw. (33693)  
17 37 attention\*.tw. (232302)  
18 38 vigilan\*.tw. (8933)  
19 39 or/28-38 (631554)  
20 40 (dementi\* or alzhem\*).tw. (82601)  
21 41 exp dementia/ (63311)  
22 42 alzheimer's disease/ (38544)  
23 43 41 or 42 (63311)  
24 44 39 or 43 (668410)  
25 45 27 and 44 (17822)  
26 46 clinical trials/ (10032)  
27 47 (randomi?ed adj7 trial\*).tw. (40375)  
28 48 (controlled adj3 trial\*).tw. (33223)  
29 49 (clinical adj2 trial\*).tw. (28656)  
30 50 ((single or doubl\* or tripl\* or treb\*) and (blind\* or mask\*)).tw. (25275)  
31 51 ("4 arm" or "four arm").tw. (125)  
32 52 experiment controls/ (867)  
33 53 retrospective studies/ (381)  
34 54 ((case\* adj5 control\*) or (case adj3 comparison\*) or control group\*).tw. (81862)  
35 55 exp Longitudinal Studies/ (15780)  
36 56 longitudinal studies/ (15306)  
37 57 Followup Studies/ (12353)  
38 58 cohort.tw. (49483)  
39 59 longitudinal.tw. (90266)  
40 60 prospective.tw. (48210)  
41 61 retrospective.tw. (28144)  
42 62 or/46-61 (341322)  
43  
44  
45  
46  
47  
48  
49  
50  
51  
52  
53  
54  
55  
56  
57  
58  
59  
60

63 45 and 62 (2588)

64 limit 63 to english language (2504)

\*\*\*\*\*

## SCOPUS (3267 results on 2016.12.02)

(((((TITLE-ABS-KEY("central spinal cord syndrome")) OR (TITLE-ABS-KEY("central cord injury syndrome")) OR ((TITLE-ABS-KEY(mTBI\* OR tbi\* OR concuss\*)) OR (TITLE-ABS-KEY(((head\* or cerebr\* or crani\* or capitis\* or brain\* or forebrain\* or skull\* or hemispher\* or intracran\* or orbit\*) NEAR/2 (injur\* or trauma\* or lesion\* or damag\* or wound\* or destruction\* or swell\*) ) ) OR (TITLE-ABS-KEY(((head\* or cerebr\* or crani\* or capitis\* or brain\* or forebrain\* or skull\* or hemispher\* or intracran\* or orbit\*) NEAR/2 (oedema\* or edema\* or fracture\* or contusion\* or commotion\* or pressur\*)))) OR (TITLE-ABS-KEY(((brain\* or cerebr\* or intracerebr\* or crani\* or intracran\* or head\* or subarachnoid\* or subdural\* or epidural\* or extradural\*) NEAR/2 (haematoma\* or hematoma\* or hemorrhag\* or haemorrhag\* or pressur\* or bleed\*)))) OR (TITLE-ABS-KEY((myelopathy NEAR/3 (traumatic or post-traumatic)))) OR (TITLE-ABS-KEY(((spine or spinal) NEAR/3 (fracture\* or wound\* or trauma\* or injur\* or damag\*)))) OR (TITLE-ABS-KEY((spinal cord NEAR/3 (contusion\* or laceration\* or transaction\* or trauma\* or ischemi\*)))) OR (TITLE-ABS-KEY((paraplegia\* or quadriplegia\* or tetraplegia\*)))) OR (TITLE-ABS-KEY((brain NEAR/2 (death or dead)))) OR (TITLE-ABS-KEY(((vegetat\* or unawareness\* or "minimally conscious" NEAR/2 state\*))) OR (TITLE-ABS-KEY( (prolonged NEAR/2 unawareness\*))) OR (TITLE-ABS-KEY( (central nervous system NEAR/2 trauma\*))) OR (TITLE-ABS-KEY((CNS NEAR/2 trauma\*))) AND (((TITLE-ABS-KEY(cognitive or cognition OR neurocogniti\*) OR TITLE-ABS-KEY((executive NEAR/2 (function\* or control\*)))) OR (TITLE-ABS-KEY(arous\* OR attention\* OR vigilan\* OR dementi\* or alzhem\*))) AND (((TITLE-ABS-KEY((controlled NEAR/3 trial\*)) OR TITLE-ABS-KEY((clinical NEAR/2 trial\*)) OR TITLE-ABS-KEY(((single or doubl\* or tripl\* or treb\*) and (blind\* or mask\*))) OR TITLE-ABS-KEY( ("4 arm" or "four arm")) OR TITLE-ABS-KEY((case\* NEAR/5 control\* ) OR TITLE-ABS-KEY((case NEAR/3 comparison\* ) OR TITLE-ABS-KEY(control group\*) OR TITLE-ABS-KEY(cohort\* OR longitudinal OR prospective OR retrospective))) OR (TITLE-ABS-KEY(random\*)) OR (TITLE-ABS-KEY((randomized NEAR/7 trial\*) OR (randomised NEAR/7 trial\*)))) AND ( LIMIT-TO(LANGUAGE,"English" ) )

## Pubmed Supplemental Search (835 results on 2016.12.05)

1  
 2  
 3  
 4 (((((((((((((((((((mTBI[Text Word] OR TBI[Text Word] OR concuss[Text Word]))) OR  
 5 (((head\*[Text Word] OR cerebr\*[Text Word] OR cranium[Text Word] OR cranial[Text Word] OR  
 6 capitis\*[Text Word] OR brain\*[Text Word] OR forebrain\*[Text Word] OR skull\*[Text Word] OR  
 7 hemispher\*[Text Word] OR intracran\*[Text Word] OR orbit\*[Text Word])) AND (injur\*[Text Word]  
 8 OR trauma\*[Text Word] OR lesion\*[Text Word] OR damag\*[Text Word] OR wound\*[Text Word]  
 9 OR destruction\*[Text Word] OR swell\*[Text Word] OR oedema\*[Text Word] OR edema\*[Text  
 10 Word] OR fracture\*[Text Word] OR contusion\*[Text Word] OR commotion\*[Text Word] OR  
 11 pressur\*[Text Word]))) OR (((brain\*[Text Word] OR cerebr\*[Text Word] OR intracerebr\*[Text  
 12 Word] OR cranium[Text Word] OR cranial[Text Word] OR intracran\*[Text Word] OR head\*[Text  
 13 Word] OR subarachnoid\*[Text Word] OR subdural\*[Text Word] OR epidural\*[Text Word] OR  
 14 extradural\*[Text Word])) AND (haematoma\*[Text Word] OR hematoma\*[Text Word] OR  
 15 hemorrhag\*[Text Word] OR haemorrhag\*[Text Word] OR pressur\*[Text Word] OR bleed\*[Text  
 16 Word]))) OR ((traumatic myelopathy[Text Word] OR post-traumatic myelopathy[Text Word])) OR  
 17 (((spine[Text Word] OR spinal[Text Word])) AND (fracture\*[Text Word] OR wound\*[Text Word]  
 18 OR trauma\*[Text Word] OR injur\*[Text Word] OR damag\*[Text Word])) OR ((spinal cord[Text  
 19 Word] AND (contusion\*[Text Word] OR laceration\*[Text Word] OR transaction\*[Text Word] OR  
 20 trauma\*[Text Word] OR ischemi\*[Text Word])) OR (((SCI[Text Word] OR paraplegia\*[Text  
 21 Word] OR quadriplegia\*[Text Word] OR tetraplegia\*[Text Word]))) OR ("central spinal cord  
 22 syndrome"[Text Word] OR "central cord injury syndrome"[Text Word]) OR ((brain death[Text  
 23 Word] OR brain dead[Text Word]) OR prolonged unawareness\*[Text Word] OR ((vegetat\*  
 24 state\*[Text Word] OR "state of unawareness"[Text Word] OR minimally conscious state\*[Text  
 25 Word])) OR central nervous system trauma\*[Text Word] OR CNS Trauma\*[Text Word])) AND  
 26 (((((((neurocognit\*[Text Word] OR (cognition[Text Word] OR cognitive[Text Word])) OR  
 27 executive function\*[Text Word] OR arous\*[Text Word] OR attention\*[Text Word] OR  
 28 vigilan\*[Text Word] OR dement\*[Text Word] OR alzhem\*[Text Word]))) AND (((((trial\*[Text  
 29 Word] OR blind\*[Text Word] OR mark\*[Text Word] OR random\*[Text Word])) OR case  
 30 control\*[Text Word] OR case comparison\*[Text Word] OR control group\*[Text Word] OR  
 31 (cohort[Text Word] OR longitudinal[Text Word] OR retrospective[Text Word] OR prospective[Text  
 32 Word]))) AND (((pubstatusaheadofprint OR publisher[<sub>sb</sub>] OR pubmednotmedline[<sub>sb</sub>])) AND  
 33 English[<sub>lang</sub>]) AND English[<sub>lang</sub>])

# BMJ Open

## The course and prognostic factors of cognitive status after central nervous system trauma: A systematic review protocol

|                                 |                                                                                                                                                                                                                                                                                                                                                                                                                                                                                              |
|---------------------------------|----------------------------------------------------------------------------------------------------------------------------------------------------------------------------------------------------------------------------------------------------------------------------------------------------------------------------------------------------------------------------------------------------------------------------------------------------------------------------------------------|
| Journal:                        | <i>BMJ Open</i>                                                                                                                                                                                                                                                                                                                                                                                                                                                                              |
| Manuscript ID                   | bmjopen-2017-017165.R1                                                                                                                                                                                                                                                                                                                                                                                                                                                                       |
| Article Type:                   | Protocol                                                                                                                                                                                                                                                                                                                                                                                                                                                                                     |
| Date Submitted by the Author:   | 29-Jun-2017                                                                                                                                                                                                                                                                                                                                                                                                                                                                                  |
| Complete List of Authors:       | Mollayeva , Tatyana; Toronto Rehabilitation Institute, Research; University of Toronto, Rehabilitation Sciences Institute<br>Pacheco, Nicole; Acquired Brain Injury and Society Research Toronto Rehabilitation Institute-University Health Network, McMaster University<br>D'Souza, Andrea ; Acquired Brain Injury and Society Research Toronto Rehabilitation Institute-University Health Network, Research<br>Colantonio, Angela; University of Toronto, Rehabilitation Science Institute |
| <b>Primary Subject Heading</b>: | Neurology                                                                                                                                                                                                                                                                                                                                                                                                                                                                                    |
| Secondary Subject Heading:      | Rehabilitation medicine, Research methods, Patient-centred medicine                                                                                                                                                                                                                                                                                                                                                                                                                          |
| Keywords:                       | traumatic brain injury, spinal cord injury, prognosis, cognition, Ia level of evidence, sex differences                                                                                                                                                                                                                                                                                                                                                                                      |
|                                 |                                                                                                                                                                                                                                                                                                                                                                                                                                                                                              |

SCHOLARONE™  
Manuscripts

**Title:** The course and prognostic factors of cognitive status after central nervous system trauma:  
A systematic review protocol

**Authors:** Tatyana Mollayeva, MD, PhD <sup>1-3</sup>, Nicole Pacheco <sup>3,4</sup>, Andrea D'Souza <sup>3</sup>, Angela Colantonio, PhD <sup>1-3</sup>

**Author details**

<sup>1</sup>Rehabilitation Sciences Institute, Faculty of Medicine, University of Toronto, Canada <sup>2</sup>Toronto Rehab-University Health Network, Ontario, Canada <sup>3</sup>Acquired Brain Injury Research Lab, University of Toronto, Canada, <sup>4</sup>Faculty of Health Sciences, McMaster University, Canada.

**Tatyana Mollayeva, MD, PhD (corresponding author)**

Postdoctoral research fellow

Toronto Rehabilitation Institute

550 University Avenue, Rm 11207

Toronto, Ontario M5G 2A2

tatyana.mollayeva@utoronto.ca

tel: 416-597-3422 ext 7848

fax: 416-946-8570

**Nicole Pacheco, BSc Student, summer research intern**

Acquired Brain Injury and Society Research

Toronto Rehabilitation Institute-University Health Network

550 University Avenue

Toronto, Ontario M5G 2A2

1  
2  
3 McMaster University

4  
5 pacheent@mcmaster.ca

6  
7  
8 tel: 416-433-7189  
9

10  
11  
12 **Andrea D'Souza, HBSc, summer research intern**

13  
14  
15 Acquired Brain Injury and Society Research

16  
17 Toronto Rehabilitation Institute-University Health Network

18  
19  
20 550 University Avenue

21  
22 Toronto, Ontario M5G 2A2

23  
24 andreaseverina.dsouza@mail.utoronto.ca

25  
26  
27 tel: 416-230-5108  
28  
29

30  
31  
32 **Angela Colantonio, PhD**

33  
34 Director, Rehabilitation Sciences Institute

35  
36 University of Toronto

37  
38 160-500 University Ave.

39  
40 Toronto, Ontario M5G 1V7

41  
42 angela.colantonio@utoronto.ca

43  
44  
45 tel: 416-978-1098

46  
47  
48 fax: 416-946-8570  
49

50  
51  
52 **Word count: 4561**  
53  
54  
55  
56  
57  
58  
59  
60

## **Abstract**

*Introduction:* Traumatic brain injury (TBI) is among the most disabling injuries, resulting in a range of cognitive impairments. Traumatic spinal cord injury (SCI) often occurs in conjunction with TBI; the two are best considered together in the context of trauma to the central nervous system (CNS). Despite strong indications of cognitive dysfunction in CNS trauma, little is known about its natural history or relationship with other factors. The current protocol outlines a strategy for a systematic review of the current evidence examining CNS trauma as a prognostic factor of cognitive status in the adult population.

*Methods and analysis:* The review will be conducted and reported in accordance with the Preferred Reporting Items for Systematic Reviews and Meta-Analyses guidelines. All peer-reviewed English language publications with a longitudinal design that focus on cognition in adults (ages 18 and older) with either TBI, or SCI, or both from inception to December 2016 found through Medline, Central, Embase, Scopus, PsycINFO, supplemental PubMed and bibliographies of identified articles will be considered eligible. Quality will be evaluated using published guidelines. Results will be grouped by: (a) prognostic factors of cognitive deficits; and (b) development of, or time until development of, cognitive deficit in patients with CNS trauma. Close attention will be paid to the evaluative properties of the measurements used to assess cognition.

*Ethics and dissemination:* The authors will publish findings from this review in a peer-reviewed scientific journal (s) and present the results at national and international conferences. This work will advance scientific certainty regarding natural history and prognostic factors of cognitive



1  
2  
3 status in males and females with CNS trauma, informing clinicians, policy makers, and future  
4  
5 researchers on the topic.  
6  
7

8  
9 *Registration details:* CRD42017055309.  
10

11  
12 **Keywords:** traumatic brain injury; traumatic spinal cord injury; cognition; Alzheimer's disease;  
13  
14 prognosis; natural history; males, females; Ia level of evidence; systematic review  
15  
16  
17  
18  
19  
20  
21  
22  
23  
24  
25  
26  
27  
28  
29  
30  
31  
32  
33  
34  
35  
36  
37  
38  
39  
40  
41  
42  
43  
44  
45  
46  
47  
48  
49  
50  
51  
52  
53  
54  
55  
56  
57  
58  
59  
60

### **Strengths and limitations of this study**

- During the developmental phase of the project, concepts and hypotheses were formulated based on a synthesis of relevant discoveries across various disciplines and previous research
- The multilevel risk of bias assessment allows to detect main flaws in the individual studies' design and inform future research on the topic
- Special attention will be paid to measurements used to assess cognitive function in patients with CNS trauma
- We acknowledge expected heterogeneity in the primary studies, with variation between studies in sample characteristics, as well as in definitions of primary outcome
- Severe CNS trauma cases are expected to be underrepresented in the inception cohorts and the majority of the patients are expected to be males; this would limit the precision of estimates and generalizability of results
- We acknowledge the chance of publication bias and a bias associated with exaggerating the estimate of the actual effect due to inclusion of only peer-reviewed studies published in English.

## **Introduction**

### *Description of the condition*

Central nervous system (CNS) trauma – including traumatic brain injury (TBI) and traumatic spinal cord injury (SCI)<sup>1</sup> – has been implicated as a risk factor for a range of cognitive impairments, particularly in the domains of attention, memory, emotion, and behaviour.<sup>2-4</sup> Recent studies have presented solid evidence that patients with a history of CNS trauma may develop various neurodegenerative disorders including Alzheimer’s disease (AD).<sup>4-6</sup> However, our understanding of *when* (i.e., post-injury timeframe) and *in whom* (i.e., characteristic of an injured person) AD dementia develops after CNS trauma (TBI, SCI, or both) -- with respect to sustained and/or degrading cognitive impairment post-injury- remains limited,<sup>4, 7, 8</sup> and reported rates of cognitive decline after TBI and traumatic SCI are quite variable.<sup>9, 10</sup> This variability has prompted interest in longitudinal studies that have focused on cognition in persons with CNS trauma across their post-injury lifespans.<sup>11, 12</sup> To assess longitudinal changes in cognitive status post-injury, evaluative instruments or composite tests that are able to measure these changes in cognition after CNS trauma over time are crucial.<sup>13</sup> A recent study was conducted on the factors associated with the rate of decline and evolution from mild cognitive impairment (MCI) to AD dementia in elderly patients, estimated from three common global measures of cognition. This study appeared to have findings that varied depending on the evaluative measure used.<sup>14</sup> The study of measurements’ properties of cognition in patients with CNS trauma is still in its infancy, and-when reporting cognitive decline associated with CNS trauma- evaluative properties of measurements have rarely been discussed or acknowledged. In order to come to a robust

1  
2  
3 conclusion on the course of cognitive status after TBI, appropriately evaluating the properties of  
4  
5 measurements must be done in the process of data synthesis.  
6  
7

### 8 9 *Description of measurements' needs*

10  
11  
12 Under the framework of Kirshner and Guyatt, measurements used to evaluate change over time  
13  
14 in any domain should be: (1) reliable (i.e., possess adequate internal consistency and  
15  
16 responsiveness test-retest reliability in the population of interest) and (2) correspond closely to  
17  
18 the construct to be measured.<sup>15</sup> Until now, research on cognitive status after TBI has focused on  
19  
20 patients' 'capacity' (i.e., what the patient can do when he or she is invited to), 'perceived ability'  
21  
22 (i.e., what the patient thinks they can do), and 'cognitive activity' (i.e., what the patient can  
23  
24 actually do), which are different constructs.<sup>16</sup> As such, when assessing CNS trauma-related  
25  
26 deficits in language, perception, memory, reasoning, attention, etc., a solid knowledge and  
27  
28 understanding of the tests applied to measure these specific deficits is of great importance.  
29  
30  
31  
32  
33

### 34 35 *How sex might affect results*

36  
37  
38 Another important area to consider in the study of cognition after CNS trauma and the risk of  
39  
40 development of AD is sex (i.e., biological differences between males and females). Often, CNS  
41  
42 trauma is considered to be an injury of males. Overall and in almost every age group, TBI and  
43  
44 SCI more frequently occurs in males than in females.<sup>17, 18</sup> These differences may reflect the high  
45  
46 rate of general injuries among males and/or differences in risk taking societal roles and  
47  
48 behaviours, that are relevant to the construct of gender, rather than sex.<sup>19</sup> In contrast, the  
49  
50 preponderance of current evidence indicates that an increased risk of AD exists in females,  
51  
52 which is even more pronounced at an advanced age.<sup>20</sup> The reason behind sex differences in the  
53  
54  
55  
56  
57  
58  
59  
60

1  
2  
3 risk of AD is unknown, especially because many human studies support the notion that  
4  
5 oestrogen, especially brain oestradiol, improves and conserves cognitive function including  
6  
7 memory retention.<sup>21,22</sup> Consistent with this theoretical gap, women's traditional inequalities and  
8  
9 disadvantages in access to and control of resources have resulted in the present scarcity of data  
10  
11 on women with CNS trauma,<sup>23-25</sup> and our knowledge of whether women and men are at different  
12  
13 risks of developing cognitive impairments after CNS trauma due to differing gendered  
14  
15 vulnerabilities (i.e., injury risk, severity, access to power and resources post-injury, help-seeking  
16  
17 behaviours, health care system use, intervention response, and rehabilitation outcomes) or  
18  
19 conversely, being protected from it, is limited.<sup>26</sup> Therefore, an awareness of how cognitive status  
20  
21 after CNS trauma varies by, or parallels by sex across time points when taking gender into  
22  
23 account is critical to advance CNS trauma and AD research.  
24  
25  
26  
27  
28  
29

### 30 *How age might affect results*

31  
32  
33  
34 Age is the single most important risk factor for various domains of cognitive decline across  
35  
36 diverse cultural groups and geographic regions, including memory, language, processing speed,  
37  
38 and executive functioning.<sup>27</sup> CNS neurogenesis is known to change during one's lifespan, and  
39  
40 this is likely reflected in age-related risk for cognitive decline. However, research has  
41  
42 highlighted that associations may vary across cohorts,<sup>27</sup> suggesting that different rates of  
43  
44 cognitive decline might contribute to the global variation in age-related dementia prevalence.  
45  
46  
47 Likewise, consistent associations of cognitive function with genetics, cardiovascular health, and  
48  
49 lifestyle have been accumulated in research, each of which is relevant to the discussion of the  
50  
51 higher likelihood of being involved in an injury with CNS outcome.<sup>28</sup> The need to explore how  
52  
53  
54  
55  
56  
57  
58  
59  
60

1  
2  
3 age-dependent factors associate with other risk factors in patients with CNS trauma cannot be  
4  
5 undermined.  
6  
7

### 8 9 *Objectives*

10  
11  
12 The aim of the current study is to identify, appraise, and synthesize all available longitudinal  
13 studies relevant to the discussion of cognitive function in males and females following CNS  
14 trauma in an attempt to: (1) document the course of cognitive status (decline, improvement,  
15 stability, fluctuations, etc.) in patients with CNS trauma as time since injury progresses; (2)  
16 determine prognostic factors of development of cognitive deficits in patients with CNS trauma  
17 from the baseline to follow-up; and (3) summarize sex- and age-stratified results pertaining to the  
18 course of cognitive status in patients with CNS trauma. Finally, the current study intends to  
19 provide a systematic consideration, solid description, and in-depth understanding of the range of  
20 measurements utilized to assess cognition in CNS trauma research. This study also aims to report  
21 on these instruments' test-retest reliability and construct validity, which are key psychometric  
22 properties necessary for evaluative purposes. This study is operating under the hypothesis which  
23 states that acutely derived CNS trauma variables alone (i.e., age, sex, TBI mechanism, level of  
24 SCI, injury severity, etc.), are not sufficient to accurately predict cognitive status and/or its  
25 domains after CNS trauma. Furthermore, it is hypothesized that cognitive deficits following CNS  
26 trauma are the product of diverse external and internal influences acting on a genetically  
27 determined substrate and that many of these external influences are modifiable (Figure 1). The  
28 current protocol outlines a strategy for this systematic review.  
29  
30  
31  
32  
33  
34  
35  
36  
37  
38  
39  
40  
41  
42  
43  
44  
45  
46  
47  
48  
49  
50  
51  
52  
53  
54  
55  
56  
57  
58  
59  
60

## **Methods and analysis**

The review will be conducted and reported in compliance with the Preferred Reporting Items for Systematic Reviews and Meta-Analyses (PRISMA) guidelines.<sup>29</sup> In accordance with these guidelines, the systematic review protocol was registered with the International Prospective Register of Systematic Reviews (PROSPERO)<sup>30</sup> on January 16, 2017 (registration number, CRD42017055309).

### *Criteria for considering studies for this review*

#### Types of studies and setting

- Peer-reviewed published longitudinal studies (i.e., studies that have cognition on at least two separate occasions) in English, conducted in adults with a clinical diagnosis of CNS trauma (TBI, or SCI, or both) regardless of research setting. Studies of SCI of only traumatic origin will be considered.
- Studies that were primarily designed to investigate the course and predictors of cognitive deficits in patients with CNS trauma.

#### Participants and assessment

- Males and females aged 18 years or older, with TBI or SCI or both, defined by clinical criteria.
- Any means of clinical diagnosis or standardised assessment of cognition. For more information, we refer the reader to section *Constructs of cognitive function, cognitive deficits, and AD*

### Types of outcome measures

The primary outcomes include (i) cognitive function or (ii) development of-or time until development of-possible or probable cognitive deficit in patients with CNS trauma.

#### *Constructs of cognitive function, cognitive deficits, and AD*

Cognitive function is referred to as the mental action or process of acquiring knowledge and understanding through thoughts, experiences, and senses.<sup>31</sup> It encompasses processes such as knowledge, attention, memory and working memory, judgment and evaluation, reasoning and "computation," problem solving and decision making, comprehension and production of language, etc.<sup>31</sup> Any measures of cognition (or its domains) (e.g., the presence or absence of cognitive deficits determined using a single question, a case definition of any measure of cognitive domain by a standardized clinical tool, or cognitive domain scores reported as a continuous variable) will be considered.

Development of a cognitive deficit in patients with CNS trauma will be assigned based on the Diagnostic and Statistical Manual of Mental Disorders Fifth edition (DSM-V) criteria for MCI, namely: (1) evidence of modest cognitive decline from a previous level of performance in one or more cognitive domains (complex attention, executive function, learning and memory, language, perceptual motor, or social cognition) based on: (i) concern of the individual, a knowledgeable informant, or the clinician that there has been a mild decline in cognitive function; and (ii) modest impairment in cognitive performance, preferably documented by standardized neuropsychological testing or, in its absence, another quantified clinical assessment; and (2) the cognitive deficits do not interfere with the capacity for independence in everyday activities (i.e.,



1  
2  
3 complex instrumental activities of daily living such as paying bills or managing medications are  
4 preserved, but greater effort, compensatory strategies, or accommodation may be required.<sup>32</sup>  
5  
6  
7

8  
9 Alzheimer's disease or dementia  
10

11  
12 This systematic review concerns sustained and/or degrading cognitive function post-injury, as  
13 well as cognitive complaints of uncertain clinical significance (i.e., MCI with questionable  
14 deficits on quantitative tests) starting early after the injury. While at this time, there is sparse data  
15 on how many individuals with CNS trauma will eventually progress to definite AD, some TBI  
16 patients with MCI have shown, on autopsy, findings of histopathological AD.<sup>33,34</sup> The animal  
17 literature has also demonstrated evidence of features of AD arising shortly after the onset of  
18 TBI.<sup>35,36</sup> These results suggest that in patients with CNS trauma, MCI detected very early post-  
19 injury may represent the initial clinical presentation of AD. As part of this review, close attention  
20 will be paid to patients at risk of having a high probability of AD – patients with MCI at  
21 baseline/early after injury (particularly mild injury severity cases) but who have progressed  
22 rapidly into cognitive deficits within first few years post-injury, characterized by uniform  
23 progression of cognitive impairments in several domains (i.e., memory, speech) and impaired  
24 activities of daily living. Further, the term dementia refers to a syndrome of brain dysfunction  
25 that is progressive, and has many possible causes; we intend to study CNS trauma as a risk for  
26 cognitive decline, with an open view to the natural course of cognitive status (improvement,  
27 decline, or relative stability) with time. Consequently, any sustained decline in cognitive status  
28 longitudinally is more reasonable in the discussion of risk of AD rather than dementia.  
29  
30  
31  
32  
33  
34  
35  
36  
37  
38  
39  
40  
41  
42  
43  
44  
45  
46  
47  
48  
49  
50  
51

52  
53  
54 *Exclusion criteria*  
55  
56  
57  
58  
59  
60

Types of studies:

- Studies investigating cognition after CNS trauma due to secondary pathological processes (e.g., oedema, intracranial haemorrhages, ischemia/infarction, vegetative/minimally conscious state, and systemic intracranial conditions)..
- Letters to editors and reviews without data, case reports, or reports; conference abstracts, articles with no primary data, theses, grey literature, and unpublished manuscripts.
- Historical limiter (1993) is set to mTBI diagnosis, given that the diagnostic criteria for mTBI were introduced by the American Congress of Rehabilitation Medicine in 1993 only.<sup>37</sup>

#### *Search methods for the identification of studies*

In collaboration with clinical experts and a medical information specialist, a comprehensive search strategy for studying cognitive function in CNS trauma was developed. All English language, peer-reviewed studies with prospective or retrospective data collection and a longitudinal design, found through Medline, Central, Embase, Scopus, PsycINFO, and supplemental PubMed, were eligible. Searches in individual databases covered publications' time frame from inception until early December 2016. The complete search strategy can be found in Supplementary File 1. We refer the reader to the Cochrane handbook and other published sources for justification of the selected databases.

#### *Searching other resources*

Reference lists of included studies will be reviewed to identify any additional studies.

### *Selection of studies*

All searches will be saved in EndNote with duplicates removed. For the first level of screening, two reviewers (TM and SM, or TM and AD) will read the titles and abstracts of all the citations from the electronic database searches and remove all citations not related to the primary research objectives. For the second level of screening, each reviewer will independently assess the full article. If the title or abstract suggests that the study might meet the inclusion criteria, each reviewer individually will assess the full text; any conflicting views will be resolved by discussion between reviewers and systematic review team members. If needed, clinical and research experts on the field will be contacted. Studies failing to meet the inclusion criteria will be excluded and the reason for exclusion will be reported.

### *Data extraction and management*

For studies fulfilling the inclusion criteria, two review authors (AS or NP for descriptive data, TM and AS or NP for outcome data) will independently extract data into data collection forms grouped according to study design. The data from observational longitudinal studies will be used to address all research objectives. Randomized control trial (RCT) studies will be treated as cohort studies by abstracting data from the control (e.g. untreated group) to address the first research objective (e.g. to determine the course of cognitive deficits) in patients with CNS trauma.

The abstracted data will include: (1) study characteristics (author names, publication year, country of study, study setting, study design, sample size, method of measuring cognition and cognitive domains covered, number of participants assessed for at each time point, time between

1  
2  
3 assessments, and time since injury to each follow-up); (2) participant characteristics (mean age,  
4 sex, education, definition of CNS (i.e., TBI, SCI), localization/level of injury, and injury  
5 severity); (3) medication regimen, if reported; and (4) results (reported frequencies of cognitive  
6 impairments, and all reported predictive associations between cognition and other variables (i.e.,  
7 age, sex, education, TBI severity, comorbidity, etc. ).  
8  
9  
10  
11  
12  
13

### 14 15 16 *Data synthesis* 17

18  
19  
20 Results of each study will be divided into two main categories: the course of cognitive deficits  
21 after CNS trauma and prognostic factors of cognitive function across assessment times.  
22  
23

24  
25  
26 To determine the course of cognitive deficits, matching assessment times (i.e. time since  
27 diagnosis when cognitive function was measured) will be grouped by their corresponding  
28 frequencies and a sample size-weighted mean frequency value will be calculated for time points  
29 with more than one contributing frequency value (i.e. more than one study reporting cognitive  
30 deficit at that time point). Results will also be grouped, if sufficient data exists, taking into  
31 account measurements used to assess cognitive function.  
32  
33  
34  
35  
36  
37  
38  
39

40  
41 Prognostic factors associated with cognition and/or its domain(s) will be extracted from all  
42 cohorts (and untreated/without an effect RCTs). All factors influencing the course of cognitive  
43 values/status, as reported by the author, will be considered as prognostic factors. A prognostic  
44 association will be considered as significant if the reported  $p$ -value is  $\leq 0.05$ , authors reported  
45 association as significant, or the 95% confidence intervals around a rate ratio or similar statistic  
46 did not exceed 1, when adjusted for at least age and sex (i.e., minimum set of confounders) in a  
47 multivariable model. Where a prognostic factor was assessed with respect to the outcome at  
48  
49  
50  
51  
52  
53  
54  
55  
56  
57  
58  
59  
60

1  
2  
3 several time-points in the same cohort, data will be extracted and reported for each follow-up  
4  
5  
6 time.

### 10 Confounding effect

11  
12 To address our research objective regarding the effect of CNS trauma on cognitive status, we  
13  
14 will evaluate the literature regarding putative negative effects in the light of other factors known  
15  
16 to affect cognition; age and sex will be considered as the minimum set of confounders associated  
17  
18 with cognition at each time point. All other confounding factors (such as medication/ illicit drug  
19  
20 use effect, comorbidities) that may affect the generalizability of the study and interpretation of  
21  
22 results will be explored and clearly described. In addition, the possible effects of measures used  
23  
24 to assess cognition will be considered and special attention will be paid to measurements'  
25  
26 psychometric properties, particularly construct validity and test-retest reliability. Finally, given  
27  
28 the nature of the research questions (i.e. prognostic factors, course), which raises the issue of  
29  
30 zero-time bias, studies will be grouped based on whether their baseline assessments were  
31  
32 conducted before or after the one-month post-injury mark. This time point was arbitrarily set.  
33  
34  
35  
36  
37  
38  
39

### 40 *Methodological quality and risk of bias assessment*

41  
42  
43 Study quality will be assessed independently by two experienced reviewers using the Quality in  
44  
45 Prognosis Studies (QUIPS) guidelines.<sup>38,39</sup> The appraisal will consist of two steps: (1)  
46  
47 assessment of six potential sources of bias (study participation and attrition, prognostic factors  
48  
49 and outcome measurements, confounding measurement and account, and analyses), and (2)  
50  
51 grading the presence of potential biases as “Yes,” “Partly,” “No,” or “Unsure.” To summarize  
52  
53 the level of evidence, the Scottish Intercollegiate Guidelines Network Methodology<sup>39</sup> will be  
54  
55  
56  
57  
58  
59  
60

1  
2  
3 utilized: (i) “++” when all or most of the quality criteria proposed by QUIPS are fulfilled  
4  
5 (allowing one “Partly” while appraising all potential sources of bias); (ii) “+” when some of the  
6  
7 criteria are fulfilled; and (iii) “-” when few or none of the criteria are fulfilled (at least one  
8  
9 “Yes”). As proposed by Scottish Intercollegiate Guidelines Network (SIGN), studies with  
10  
11 retrospective design will not receive a “++” rating. Group (i) will be referred to as “high-quality  
12  
13 studies” and group (ii) as “moderate-quality studies”. Results will be reported in a table format.  
14  
15

16  
17  
18 Finally, the consistency of the level of evidence will be summarized. Evidence will be designated  
19  
20 “strong” when consistent findings are found in multiple “moderate-quality” or one or more  
21  
22 “high-quality” studies” and the total sample size of combined eligible studies is  $\geq 100$ ;  
23  
24 “moderate” when consistent findings in multiple “moderate-quality” or one “high-quality”  
25  
26 quality study with a total sample  $\geq 50$ , or at least one “moderate-quality” or “high-quality”  
27  
28 quality study with a total sample of 50-99; “limited” when findings are found in at least one  
29  
30 quality study with a total sample of 50-99; “limited” when findings are found in at least one  
31  
32 “moderate-quality,” or “high-quality” quality study with total sample size between 25 and 49;  
33  
34 and “unknown” when findings are of indeterminate rating, in studies with poor methodological  
35  
36 quality or with a sample of  $< 25$ .<sup>39</sup> To ensure the explicit basis for bias assessment, aspects of the  
37  
38 trial methods on which the judgment for “high risk of bias” will be based as well as the judgment  
39  
40 itself- including the trial method on which the decision of exclusion was based- will be reported .  
41  
42  
43  
44

#### 45 46 *Measurements: description and properties evaluation*

47  
48

49 Using a standardized form developed for a previous systematic review on measurements’  
50  
51 properties,<sup>40</sup> details of included measurements will be extracted from original studies and  
52  
53 manuals-where available-and studies that evaluated their psychometric properties. The following  
54  
55 descriptors will be extracted and reported: general characteristics, purpose and content, method  
56  
57  
58  
59  
60

1  
2  
3 of administration, respondent burden, language (and translations), psychometric properties,  
4 particularly test-retest reliability and construct validity, and strengths and cautions for application  
5 in persons with CNS trauma.<sup>40</sup> Measurements will then be categorized into the following groups:  
6  
7  
8 (i) global measures of cognition; (ii) domain-specific measures of cognition; and (iii) multi-  
9 domain measures, which include items (subscales) of cognition among other functions.<sup>41</sup> Based  
10 on the above descriptors and using the Holmbeck et al. (2008) evidence-based assessment  
11 criteria,<sup>42</sup> a rating will be assigned – “well-established assessment,” “approaching well-  
12 established assessment,” or “promising assessment” in patients with CNS trauma– to each  
13 included measurement.  
14  
15  
16  
17  
18  
19  
20  
21  
22  
23  
24  
25

26 Given the diversity in measurements of domains of cognitive function, severity and localization  
27 of CNS trauma, as well as the high likelihood of the diversity of statistical methodology used to  
28 express associations, a best-evidence synthesis approach<sup>43</sup> will be applied, synthesizing findings  
29 from studies with sufficient quality through tabulation and qualitative description. Some features  
30 falling under meta-analysis constructs (i.e., sample size-weighted mean frequencies) will be  
31 considered only for the first research question (i.e., the course of cognitive deficits). As indicated  
32 above, for studies focusing on the same domain of cognitive deficits prevalence (i.e., executive  
33 function, etc.), sample size-weighted mean frequencies will be collected and matching  
34 assessment times (i.e. time post-injury that each domain of the cognitive function was measured)  
35 will be grouped with their corresponding frequencies. A sample size-weighted mean frequency  
36 value will be calculated for time points with more than one contributing frequency value (i.e.  
37 more than one study reporting values at that time point post-injury).  
38  
39  
40  
41  
42  
43  
44  
45  
46  
47  
48  
49  
50  
51  
52  
53

54  
55 *Dealing with missing data*  
56  
57  
58  
59  
60

1  
2  
3 In cases of missing data, primary authors will be contacted. The proportion of missing data will  
4  
5 be reported along with reasons, where indicated. In the case of duplicate publications and  
6  
7 companion papers of a primary study, we will attempt to yield maximum scientific information  
8  
9 by abstraction of all available data. Nonetheless, original publication (usually the oldest version)  
10  
11 will take priority in data analysis.  
12  
13

### 14 15 16 *Ethics and dissemination* 17

18  
19  
20 This systematic review will provide increased scientific certainty about the prognostic factors  
21  
22 and natural history of cognitive deficits in patients with CNS trauma, informing clinicians, policy  
23  
24 makers, and subsequent studies funded by the Alzheimer's Association. The strength of this  
25  
26 systematic review protocol and research program is in its methodology, making it possible to  
27  
28 identify associations longitudinally, thus improving the quality of inductive inferences about the  
29  
30 natural progression of cognitive status in patients with CNS trauma. The multilevel risk of bias  
31  
32 assessment will allow researchers to detect main flaws in the designs of individual studies and to  
33  
34 inform future research on the topic of cognition in CNS trauma. During the development phase  
35  
36 of the project, concepts and hypotheses were formulated based on a synthesis of relevant  
37  
38 discoveries across various disciplines. It is evident that the content of measurements and their  
39  
40 psychometric properties can influence estimates of cognitive impairment across time points (i.e.,  
41  
42 natural history research aim) as well as the predictors of cognition in patients with CNS trauma.  
43  
44 Likewise, earlier research has highlighted that different domains of cognition are affected  
45  
46 differently in TBI and SCI based on type, localization, and severity of injury and that the  
47  
48 perception of a person with CNS trauma can also be influenced by the duration of cognitive  
49  
50 impairment (ie, individuals could have adjusted to their long-term impairment, making them less  
51  
52  
53  
54  
55  
56  
57  
58  
59  
60



likely to recognize their degree of impairment). To mitigate these issues, a variety of data related to the domains of each measure will be collected and reported on. This approach will help researchers think about elements that constitute cognition in patients with CNS trauma, increasing the comprehensiveness of understanding and the appreciation/relevance of the measurement theory in the study of cognition. Finally, multi-level knowledge translation activities (publications, presentations, research-knowledge user collaborations) throughout this research activity will be performed. This will ensure that the program results reach their intended knowledge users with the goal of informing innovations in AD and CNS trauma research, health policy and practice.

### *Limitations*

Certain features of this review are open to debate. Those features include: (1) The assumption of expected heterogeneity in the primary studies with respect to sample characteristics (i.e. age, injury/localization of injury, time since injury) and the applied measurements of cognition properties and content; (2) potentially unequal sex distribution in primary studies, given that historically both TBI and SCI have been considered an injury specific to males; (3) age, a potential predictor of cognitive decline, may not be always reported as a continuous variable or in similar ranges; therefore, assessment of the age factor would be limited to those studies that reported it; (4) potential confounders, such as medication effects/illicit substance use and comorbidity load, may not be adequately explored given the lack of consistent reports and effect consideration in TBI research;<sup>44</sup> nonetheless, where possible, such effects will be explored; (5) baseline assessments of cognition in patients with CNS trauma are expected to vary between studies: while the issue was predicted and attempts will be made to mitigate the zero-time effect by reporting results with baseline assessments up to one month post-injury and after

1  
2  
3 one month; separately, pre-morbid assessments of cognition are unlikely to be understood, and  
4 therefore, the generalizability of the results may remain unclear due to inadequate control of the  
5  
6 confounding effects of premorbid cognitive functioning; (6) additional limitations relate to the  
7  
8 exclusion of grey literature, non- English language articles, and unpublished manuscripts and  
9  
10 their potentially relevant results; this decision was based on the extensive number of studies  
11  
12 identified within databases we have searched, as well as limited empiric evidence about the  
13  
14 potential impact of selective searching and inclusion of these works on the results of systematic  
15  
16 reviews.<sup>45</sup>  
17  
18  
19  
20  
21  
22

23 Despite the outlined limitations, this is the first review of its kind to consciously and  
24  
25 comprehensively synthesize evidence on the cognitive status in patients with CNS trauma,  
26  
27 aiming to advance scientific knowledge in the field and enrich the care provided to patients with  
28  
29 cognitive impairments stemming from traumatic brain and spinal cord injuries.  
30  
31  
32  
33

### 34 *Implications*

35  
36  
37 An aging population will increase the burden of CNS trauma as the number of people surviving  
38  
39 after the injury progressively increases. While the neurological consequences of CNS trauma are  
40  
41 well described, evidence is emerging on sex-/age-dependent associations between a prior injury  
42  
43 (most frequently TBI) and the development of senile Alzheimer's-type dementia many years  
44  
45 later. Diagnostic criteria, first established by the National Institute of Neurological and  
46  
47 Communicative Disorders and Stroke, were revised in light of the discovery of new markers--  
48  
49 amyloid-B and tau proteins – accumulation of which brings cognitive dysfunction and neuronal  
50  
51 death. These markers, shown to be non-specific in AD, appeared to be similar in persons with  
52  
53 TBI and fatal familial insomnia. To fill the gap that is left by current evidence-based practice, the  
54  
55  
56  
57  
58  
59  
60

1  
2  
3 proposed study will lay the ground for further research aimed at determining the underlying basis  
4  
5 behind any observed patterns. The significant economic and human costs of cognitive  
6  
7 dysfunction years after CNS trauma merit the call for systematic efforts to understand the factors  
8  
9 that contribute to its development. This research looks to motivate future investigations of AD  
10  
11 and CNS trauma in numerous directions.  
12  
13

### 14 15 16 **List of abbreviations** 17

18  
19  
20 AD, Alzheimer's disease; CNS, central nervous system; DSM-V, Diagnostic and Statistical  
21  
22 Manual of Mental Disorders – Fifth Edition; MCI, mild cognitive impairment; PRISMA,  
23  
24 Preferred Reporting Items for Systematic Reviews and Meta-Analyses; PROSPERO,  
25  
26 International Prospective Register of Systematic Reviews; QUIPS, Quality in Prognosis Studies;  
27  
28 RCT, randomized control trial; SCI, spinal cord injury; SIGN, Scottish Intercollegiate Guidelines  
29  
30 Network; (m)TBI, (mild) traumatic brain injury.  
31  
32  
33  
34

### 35 36 **Competing interests** 37

38  
39 The authors have no conflicts of interest to declare pertaining to this research.  
40  
41

### 42 43 **Authors' contributions** 44

45  
46 TM and AC contributed to the conception and design of the protocol. TM developed the idea,  
47  
48 designed the protocol, and built the graphic data representation (e.g. figure). AC provided  
49  
50 expertise at each level and also reviewed the protocol. TM registered the protocol PROSPERO.  
51  
52 TM wrote the first draft, which was reviewed by AC. TM registered the protocol with  
53  
54 PROSPERO. TM wrote the first draft, which was reviewed by AC. NP and AD contributed to  
55  
56  
57  
58  
59  
60

1  
2  
3 the revisions of the protocol and highlighted areas in need of refinement of scientific terms based  
4  
5 on the results of the initial screening (i.e., first screen) that they performed.  
6  
7

### 8 9 **Funding sources**

10  
11  
12 This research program is supported by the postdoctoral research grant to TM from the  
13  
14 Alzheimer's Association (AARF-16-442937). AC is supported by the Canadian Institutes for  
15  
16 Health Research Grant–Institute for Gender and Health (#CGW-126580). The funders had no  
17  
18 role in study design, data collection, decision to publish, or preparation of the manuscript.  
19  
20  
21

### 22 23 **Acknowledgements**

24  
25  
26 We gratefully acknowledge the involvement of Ms. Jessica Babineau, information specialist at  
27  
28 the Toronto Rehabilitation Institute for her help with the literature search.  
29  
30  
31

32  
33 We would like to express our sincere gratitude to Dr. Terence Quinn of the University of  
34  
35 Glasgow (Cochrane Dementia and Cognitive Improvement Team) for critically reviewing the  
36  
37 protocol and providing constructive feedback and endorsements on important methodological  
38  
39 considerations.  
40  
41  
42

### 43 44 **Data sharing statement**

45  
46  
47 Unpublished data from this study will be available will be shared with scientific/research  
48  
49 community via Dryad digital repository ([datadryad.org](http://datadryad.org)). doi:10.5061/dryad.6pb54  
50  
51  
52  
53  
54  
55  
56  
57  
58  
59  
60

**Figure legends**

File name: Figure 1

File format: Figure 1.tiff

Title of data: Conceptual model for summarizing longitudinal evidence on cognitive status in patients after central nervous system (CNS) trauma (i.e., traumatic brain injury (TBI), traumatic spinal cord injury (SCI) or both).

Description of data: This figure provides graphical representation of the conceptual model of longitudinal change in cognition and hypothesized associated factors in patients with CNS trauma.

**Additional material**

File name: Additional file 1

File format: additional file 1.docx

Title of data: Search strategies.

Description of data: This file provides the list of search terms used to search Medline, Central, Embase, Scopus, PsycINFO, and supplemental PubMed.

For peer review only

1  
2  
3  
4  
5  
6  
7  
8  
9  
10  
11  
12  
13  
14  
15  
16  
17  
18  
19  
20  
21  
22  
23  
24  
25  
26  
27  
28  
29  
30  
31  
32  
33  
34  
35  
36  
37  
38  
39  
40  
41  
42  
43  
44  
45  
46  
47  
48  
49  
50  
51  
52  
53  
54  
55  
56  
57  
58  
59  
60

## References

1. Valenzuela V, Oñate M, Hetz C, Court FA. Injury to the nervous system: A look into the ER. *Brain Res.* 2016;1648(Pt B):617-25.
2. Phillips AA, Squair JR, Currie KD, Tzeng YC, Ainslie PN, Krassioukov AV. 2015 ParaPan American Games: Autonomic Function, But Not Physical Activity, Is Associated with Vascular-Cognitive Impairment in Spinal Cord Injury. *J Neurotrauma.* 2017 doi: 10.1089/neu.2016.4751. [Epub ahead of print].
3. Wu J, Zhao Z, Kumar A, Lipinski MM, Loane DJ, Stoica BA, Faden AI. Endoplasmic Reticulum Stress and Disrupted Neurogenesis in the Brain Are Associated with Cognitive Impairment and Depressive-Like Behavior after Spinal Cord Injury. *J Neurotrauma.* 2016;33(21):1919-1935.
4. Muccigrosso MM, Ford J, Benner B, Moussa D, Burnsides C, Fenn AM, Popovich PG, Lifshitz J, Walker FR, Eiferman DS, Godbout JP. Cognitive deficits develop 1month after diffuse brain injury and are exaggerated by microglia-associated reactivity to peripheral immune challenge. *Brain Behav Immun.* 2016;54:95-109.
5. Nott MT, Baguley IJ, Heriseanu R, Weber G, Middleton JW, Meares S, Batchelor J, Jones A, Boyle CL, Chilko S. Effects of concomitant spinal cord injury and brain injury on medical and functional outcomes and community participation. *Top Spinal Cord Inj Rehabil.* 2014;20(3):225-35.
6. LoBue C, Wadsworth H, Wilmoth K, Clem M, Hart J Jr, Womack KB, Didehbani N, Lacritz LH, Rossetti HC, Cullum CM. Traumatic brain injury history is associated with earlier age of onset of Alzheimer disease. *Clin Neuropsychol.* 2017;31(1):85-98.

- 1  
2  
3 7. Collins-Praino LE, Corrigan F. Does neuroinflammation drive the relationship between tau  
4 hyperphosphorylation and dementia development following traumatic brain injury? *Brain*  
5 *Behav Immun.* 2017;60:369-382.  
6  
7
- 8  
9  
10 8. Nordström P, Michaëlsson K, Gustafson Y, Nordström A. Traumatic brain injury and young  
11 onset dementia: a nationwide cohort study. *Ann Neurol.* 2014;75(3):374-81.  
12
- 13  
14 9. Li Y, Li Y, Li X, Zhang S, Zhao J, Zhu X, Tian G. Head injury as a risk factor for demential  
15 and Alzheimer's disease : A systematic review and meta-analysis of 32 observational studies.  
16 *PlosS One.* 2017; 12 (1):e0169650.  
17  
18  
19
- 20 10. Wecht JM, Bauman WA. Decentralized cardiovascular autonomic control and cognitive  
21 deficits in persons with spinal cord injury. *J Spinal Cord Med.* 2013;36(2):74-81.  
22  
23  
24
- 25 11. Himanen L, Portin R, Isoniemi H, Helenius H, Kurki T, Tenovuo O. Longitudinal cognitive  
26 changes in traumatic brain injury: a 30-year follow-up study. *Neurology.* 2006;66(2):187-92.  
27  
28  
29
- 30 12. Craig A, Nicholson Perry K, Guest R, Tran Y, Dezarnaulds A, Hales A, Ephraums C,  
31 Middleton J. Prospective study of the occurrence of psychological disorders and  
32 comorbidities after spinal cord injury. *Arch Phys Med Rehabil.* 2015;96(8):1426-34.  
33  
34  
35
- 36 13. deVet CHW, Terwee CB, Mokkink LB, Knol DL. *Measurements in Medicine. A Practical*  
37 *Guide.* Cambridge University Press 2011.  
38  
39
- 40 14. Monsell SE, Liu D, Weintraub S, Kukull WA. Comparing measures of decline to dementia in  
41 amnesic MCI subjects in the National Alzheimer's Coordinating Center (NACC) Uniform  
42 Data Set. *Int Psychogeriatr.* 2012;24(10):1553-60.  
43  
44  
45
- 46 15. Guyatt GH, Kirshner B, Jaeschke R. Measuring health status: what are the necessary  
47 properties? *J Clin Epidemiol.* 1992; 12: 1341-5.  
48  
49  
50  
51  
52  
53  
54  
55  
56  
57  
58  
59  
60



16. deVet CHW, Terwee CB, Mokkink LB, Knol DL. Measurements in Medicine. A Practical Guide. Cambridge University Press 2011.
17. Feigin VL, Theadom A, Barker-Collo S, Starkey NJ, McPherson K, Kahan M, Dowell A, Brown P, Parag V, Kydd R, Jones K, Jones A, Ameratunga S; BIONIC Study Group.. Incidence of traumatic brain injury in New Zealand: a population-based study. *Lancet Neurol.* 2013;12(1):53-64.
18. Hagen EM, Rekand T, Gilhus NE, Grønning M. Traumatic spinal cord injuries--incidence, mechanisms and course. *Tidsskr Nor Laegeforen.* 2012;132(7):831-7.
19. Canadian Institutes of Health Research. 2015. Definitions of Sex and Gender. Retrieved March 17, 2017. <<http://www.cihr-irsc.gc.ca/e/47830.html>>
20. Mielke MM, Vemuri P, Rocca WA. Clinical epidemiology of Alzheimer's disease: assessing sex and gender differences. *Clin Epidemiol.* 2014;6:37-48.
21. Vahaba DM, Remage-Healey L. Brain estrogen production and the encoding of recent experience. *Curr Opin Behav Sci.* 2015;6:148-153.
22. Li R, Cui J, Shen Y. Brain sex matters: estrogen in cognition and Alzheimer's disease. *Mol Cell Endocrinol.* 2014 ;389(1-2):13-21
23. Mollayeva T, Colantonio A. Gender, Sex and Traumatic Brain Injury: Transformative Science to Optimize Patient Outcomes.. *Healthc Q.* 2017;20(1):6-9.
24. O'Reilly K, Wilson N, Peters K. Health, activity and participation issues for women following traumatic brain injury. *Disabil Rehabil.* 2017:1-12.
25. Stock D, Cowie C, Chan V, Cullen N, Colantonio A. Determinants of Admission to Inpatient Rehabilitation Among Acute Care Survivors of Hypoxic-Ischemic Brain Injury: A Prospective Population-Wide Cohort Study. *Arch Phys Med Rehabil.* 2016;97(6):885-91.

- 1  
2  
3  
4  
5  
6  
7  
8  
9  
10  
11  
12  
13  
14  
15  
16  
17  
18  
19  
20  
21  
22  
23  
24  
25  
26  
27  
28  
29  
30  
31  
32  
33  
34  
35  
36  
37  
38  
39  
40  
41  
42  
43  
44  
45  
46  
47  
48  
49  
50  
51  
52  
53  
54  
55  
56  
57  
58  
59  
60
26. Cancelliere C, Donovan J, Cassidy JD. Is Sex an Indicator of Prognosis After Mild Traumatic Brain Injury: A Systematic Analysis of the Findings of the World Health Organization Collaborating Centre Task Force on Mild Traumatic Brain Injury and the International Collaboration on Mild Traumatic Brain Injury Prognosis. *Arch Phys Med Rehabil.* 97(2):S5-18 (2016).
  27. Lipnicki DM, Crawford JD, Dutta R, et al.; Cohort Studies of Memory in an International Consortium (COSMIC). Age-related cognitive decline and associations with sex, education and apolipoprotein E genotype across ethnocultural groups and geographic regions: a collaborative cohort study. *PLoS Med.* 2017;14(3):e1002261.
  28. Mollayeva T, Kendzerska T, Mollayeva S, Colantonio A. Sleep apnea after traumatic brain injury: understanding the impact on executive functioning. *J Sleep Disorders: Treat Care.* 2013; 2:5.
  29. Moher D, Liberati A, Tetzlaff J, Altman DG. Preferred reporting items for systematic reviews and meta-analyses for PRISMA statement. *PLoS medicine.* 2009; 6(7).
  30. PROSPERO-International Prospective Register of Systematic Reviews. [<http://www.crd.york.ac.uk/prospero/>].
  31. Andringa TC, Bosch KA, Wijermans N. Cognition from life: the two modes of cognition that underlie moral behavior. *Front Psychol.* 2015;6:362.
  32. American Psychiatric Association. *Diagnostic and statistical manual of mental disorders.* 5th ed. Washington, DC: American Psychiatric Association, 2013.
  33. Sennik S, Schweizer TA, Fischer CE, Munoz DG. Risk Factors and Pathological Substrates Associated with Agitation/Aggression in Alzheimer's Disease: A Preliminary Study using NACC Data. *J Alzheimers Dis.* 2017;55(4):1519-28.

- 1  
2  
3  
4  
5  
6  
7  
8  
9  
10  
11  
12  
13  
14  
15  
16  
17  
18  
19  
20  
21  
22  
23  
24  
25  
26  
27  
28  
29  
30  
31  
32  
33  
34  
35  
36  
37  
38  
39  
40  
41  
42  
43  
44  
45  
46  
47  
48  
49  
50  
51  
52  
53  
54  
55  
56  
57  
58  
59  
60
34. Crane PK, Gibbons LE, Dams-O'Connor K, Trittschuh E, Leverenz JB, Keene CD, Sonnen J, Montine TJ, Bennett DA, Leurgans S, Schneider JA, Larson EB. Association of Traumatic Brain Injury With Late-Life Neurodegenerative Conditions and Neuropathologic Findings. *JAMA Neurol.* 2016;73(9):1062-9.
  35. Gerson J, Castillo-Carranza DL, Sengupta U, Bodani R, Prough DS, DeWitt DS, Hawkins BE, Kaye R. Tau Oligomers Derived from Traumatic Brain Injury Cause Cognitive Impairment and Accelerate Onset of Pathology in Htau Mice. *J Neurotrauma.* 2016;33(22):2034-43.
  36. Iino M, Nakatome M, Ogura Y, Fujimura H, Kuroki H, Inoue H, Ino Y, Fujii T, Terao T, Matoba R. Real-time PCR quantitation of FE65 a beta-amyloid precursor protein-binding protein after traumatic brain injury in rats. *Int J Legal Med.* 2003;117(3):153-9.
  37. Hayden JA, Cote P, Bombardier C. Evaluation of the quality of prognosis studies in systematic reviews. *Ann Intern Med.* 2006;144(6):427-37.
  38. Scottish Intercollegiate Guidelines Network. Published Guidelines. Assessed on February 15 2017 at: [www.sign.ac.uk/guidelines/](http://www.sign.ac.uk/guidelines/).
  39. van Tulder M, Furlan A, Bombardier C, Bouter L, Editorial Board of the Cochrane Collaboration Back Review Group. *Spine.* 2003; 28: 1290-9.
  40. Mollayeva T, Kendzerska T, Colantonio A. Self-report instruments for assessing sleep dysfunction in an adult traumatic brain injury population: a systematic review. *Sleep Med Rev.* 2013;17(6):411-23.
  41. Wesson J, Clemson L, Brodaty H, Reppermund S. Estimating functional cognition in older adults using observational assessments of task performance in complex everyday activities:

1  
2  
3 A systematic review and evaluation of measurement properties. *Neurosci Biobehav Rev.*  
4  
5 2016; 68:335-60.  
6

7  
8 42. Holmbeck GN, Thill AW, Bachanas P, Garber J, Miller KB, Abad M, Bruno EF, Carter JS,  
9  
10 David-Ferdon C, Jandasek B, Mennuti-Washburn JE, O'Mahar K, Zukerman J. Evidence-  
11  
12 based assessment in pediatric psychology: measures of psychosocial adjustment and  
13  
14 psychopathology. *J Pediatr Psychol.* 2008;33(9):958-80.  
15  
16

17  
18 43. Slavin RE. Best evidence synthesis: an intelligent alternative to meta-analysis. *J Clin*  
19  
20 *Epidemiol.* 1995;48(1):9-18.  
21

22  
23 44. Mollayeva T, Kendzerska T, Mollayeva S, Shapiro CM, Colantonio A, Cassidy JD. A  
24  
25 systematic review of fatigue in patients with traumatic brain injury: the course, predictors and  
26  
27 consequences. *Neurosci Biobehav Rev.* 2014; 47:684-716.  
28

29  
30 45. Hartling L, Featherstone R, Nuspl M, Shave K, Dryden DM, Vandermeer B. Grey literature  
31  
32 in systematic reviews: a cross-sectional study of the contribution of non-English reports,  
33  
34 unpublished studies and dissertations to the results of meta-analyses in child-relevant  
35  
36 reviews. *BMC Med Res Methodol.* 2017;17(1):64.  
37  
38  
39  
40  
41  
42  
43  
44  
45  
46  
47  
48  
49  
50  
51  
52  
53  
54  
55  
56  
57  
58  
59  
60

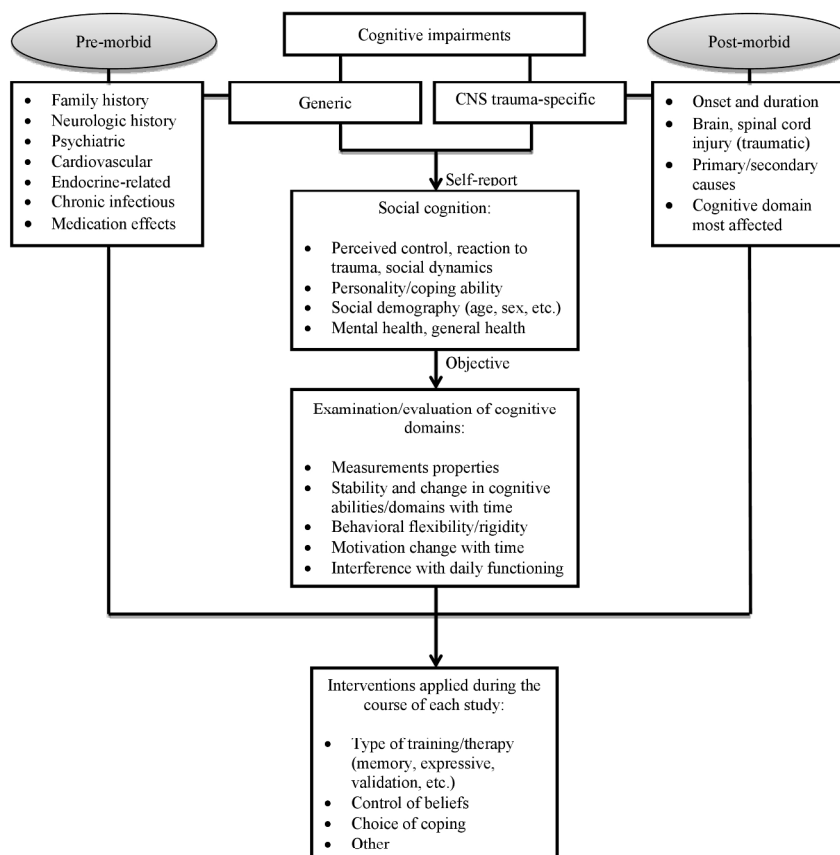

Figure 1. Conceptual model for summarizing longitudinal evidence on cognitive status in patients after central nervous system (CNS) trauma (i.e., traumatic brain injury (TBI), traumatic spinal cord injury (SCI) or both)

Conceptual model for summarizing longitudinal evidence on cognitive status in patients after central nervous system (CNS) trauma (i.e., traumatic brain injury (TBI), traumatic spinal cord injury (SCI) or both).

215x279mm (300 x 300 DPI)

**SEARCH DETAILS**

Searches conducted in Medline and Medline in-process, Embase, Cochrane Central Register of Controlled Trials, PsycINFO. A supplemental search was conducted in Pubmed to identify non-Medline records. All searches were conducted from inception of the database to December 2016. All searches were limited to English. Searches were conducted by an Information Specialist (JB).

**PRE-DUPLICATE REMOVAL**

TOTAL Results: 29564

Medline: 9214

Embase: 12609

Central: 1135

PsycINFO: 2504

Scopus: 3267

Supplemental Pubmed search for NON-MEDLINE results: 835

| My Library            | #       |
|-----------------------|---------|
| All References        | (29564) |
| Imported References   | (35)    |
| Unfiled               | (0)     |
| Trash                 | (1264)  |
| <b>My Groups</b>      |         |
| CENTRAL_2016.12.01    | (1135)  |
| Embase_2016.12.01     | (12609) |
| Medline_2016.12.01    | (9214)  |
| PsycINFO_2016.12.02   | (2504)  |
| Pubmed_2016.12.05     | (835)   |
| SCOPUS_2016.12.02     | (3267)  |
| <b>Find Full Text</b> |         |

**POST-QUICK DUPLICATE REMOVAL**

TOTAL Results: 22654

Duplicates Removed: 6910

Medline: 8197

Embase: 11557

Central: 354

PsycINFO: 882

Scopus: 1213

Supplemental Pubmed search for NON-MEDLINE results: 451

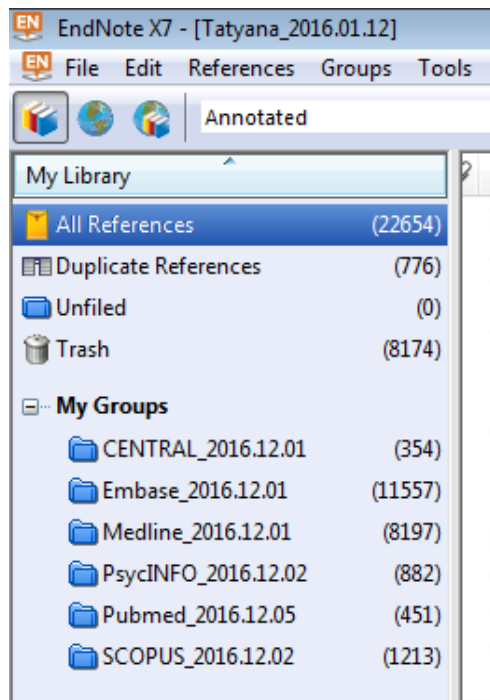

## **SEARCH STRATEGIES**

### **Epub Ahead of Print, In-Process & Other Non-Indexed Citations, Ovid MEDLINE(R) Daily and Ovid MEDLINE(R) <1946 to Present>**

Search Strategy:

- 
- 1 exp brain injuries/ (62019)
  - 2 Craniocerebral Trauma/ (21460)
  - 3 exp Head Injuries, Closed/ (9310)
  - 4 exp Skull Fractures/ (20416)
  - 5 mTBI\*2.tw. (1804)
  - 6 tbi\*2.tw. (21603)
  - 7 concuss\*.tw. (6210)
  - 8 ((head\* or cerebr\* or crani\* or capitis\* or brain\* or forebrain\* or skull\* or hemispher\* or intracran\* or orbit\*) adj2 (injur\* or trauma\* or lesion\* or damag\* or wound\* or destruction\* or swell\* or oedema\* or edema\* or fracture\* or contusion\* or commotion\* or pressur\*)).tw. (175759)
  - 9 ((brain\* or cerebr\* or intracerebr\* or crani\* or intracran\* or head\* or subarachnoid\* or subdural\* or epidural\* or extradural\*) adj (haematoma\* or hematoma\* or hemorrhag\* or haemorrhag\* or pressur\* or bleed\*)).tw. (76211)
  - 10 or/1-9 (270610)
  - 11 exp Spinal Cord Injuries/ (44778)
  - 12 exp Central Cord Syndrome/ (83)
  - 13 (myelopathy adj3 (traumatic or post-traumatic)).tw,kw. (98)
  - 14 ((spine or spinal) adj3 (fracture\* or wound\* or trauma\* or injur\* or damag\*)).tw,kw. (49823)
  - 15 (spinal cord adj3 (contusion\* or laceration\* or transaction\* or trauma\* or ischemi\*)).tw,kw. (7108)

1  
2  
3  
4 16 SCI.tw,kw. (30348)  
5 17 exp Paraplegia/ (12903)  
6 18 exp Quadriplegia/ (7861)  
7 19 (paraplegia\* or quadriplegia\* or tetraplegia\*).tw,kw. (16952)  
8 20 Spinal Cord Compression/ (10657)  
9 21 exp Cervical Vertebrae/in (7544)  
10 22 central spinal cord syndrome.tw,kw. (10)  
11 23 central cord injury syndrome.tw,kw. (1)  
12 24 or/11-23 (108760)  
13 25 Brain Death/ (8074)  
14 26 (brain adj2 (death or dead)).tw,kw. (7913)  
15 27 ((vegetat\* or unawareness\* or "minimally conscious") adj2 state\*1).tw,kw. (3285)  
16 28 (prolonged adj2 unawareness\*).tw,kw. (10)  
17 29 25 or 26 or 27 or 28 (14590)  
18 30 (central nervous system adj2 trauma\*).tw,kw. (334)  
19 31 (CNS adj2 trauma\*).tw,kw. (529)  
20 32 10 or 24 or 29 or 30 or 31 (384413)  
21 33 exp Cognition/ (142070)  
22 34 exp Cognition Disorders/ (85970)  
23 35 neurocognit\*.tw,kw. (17260)  
24 36 (cognitive or cognition).tw,kw. (316220)  
25 37 Executive Function/ (10349)  
26 38 (executive adj2 (function\* or control\*)).tw,kw. (23269)  
27 39 exp Arousal/ (114735)  
28 40 arousal\*.tw,kw. (32131)  
29 41 attention\*.tw,kw. (343363)  
30 42 vigilan\*.tw,kw. (17025)  
31 43 or/33-42 (818304)  
32 44 32 and 43 (29440)  
33 45 (dementi\* or alzheimer\*).tw,kw. (188105)  
34 46 exp dementia/ (154811)  
35 47 45 or 46 (227210)  
36 48 32 and 47 (8285)  
37 49 exp clinical trial/ (816969)  
38 50 exp Clinical Trials as Topic/ (323082)  
39 51 multicenter studies as topic/ (17817)  
40 52 (randomi?ed adj7 trial\*).tw,kw. (309575)  
41 53 (controlled adj3 trial\*).tw,kw. (213828)  
42 54 (clinical adj2 trial\*).tw,kw. (309587)  
43 55 ((single or doubl\* or tripl\* or treb\*) and (blind\* or mask\*)).tw,kw. (174728)  
44 56 ("4 arm" or "four arm").tw,kw. (928)  
45 57 or/49-56 (1341652)  
46 53 Annotation: Clinical trial SOURCE:  
47 54 [http://libguides.sph.uth.tmc.edu/search\\_filters/ovid\\_medline\\_filters](http://libguides.sph.uth.tmc.edu/search_filters/ovid_medline_filters)  
48 55 Case-Control Studies/ (250991)  
49 56 Control Groups/ (1791)  
50 57  
51 58  
52 59  
53 60



60 Matched-Pair Analysis/ (4926)  
 61 retrospective studies/ (643251)  
 62 ((case\* adj5 control\*) or (case adj3 comparison\*) or control group\*).tw,kw.  
 63 (528797)

63 or/58-62 (1282282)

Annotation: Case control SOURCE:

[http://libguides.sph.uth.tmc.edu/search\\_filters/ovid\\_medline\\_filters](http://libguides.sph.uth.tmc.edu/search_filters/ovid_medline_filters)

64 cohort studies/ (233586)

65 longitudinal studies/ (120931)

66 follow-up studies/ (595123)

67 prospective studies/ (464936)

68 cohort.tw,kw. (404386)

69 longitudinal.tw,kw. (206890)

70 prospective.tw,kw. (477259)

71 retrospective.tw,kw. (391544)

72 or/64-71 (1958903)

Annotation: Cohort source:

[http://libguides.sph.uth.tmc.edu/search\\_filters/ovid\\_medline\\_filters](http://libguides.sph.uth.tmc.edu/search_filters/ovid_medline_filters)

73 controlled before-after studies/ or interrupted time series analysis/ (462)

74 57 or 63 or 72 or 73 (3688853)

75 44 and 74 (8776)

76 48 and 74 (1798)

77 75 or 76 (9756)

78 limit 77 to english language (9214)

\*\*\*\*\*

### Cochrane Central Register of Controlled Trials <October 2016>

Search Strategy:

1 exp brain injuries/ (1087)

2 Craniocerebral Trauma/ (244)

3 exp Head Injuries, Closed/ (156)

4 exp Skull Fractures/ (178)

5 mTBI\*2.tw. (85)

6 tbi\*2.tw. (1060)

7 concuss\*.tw. (147)

8 ((head\* or cerebr\* or crani\* or capitis\* or brain\* or forebrain\* or skull\* or  
 hemispher\* or intracran\* or orbit\*) adj2 (injur\* or trauma\* or lesion\* or damag\* or  
 wound\* or destruction\* or swell\* or oedema\* or edema\* or fracture\* or contusion\* or  
 commotion\* or pressur\*).tw. (5744)

9 ((brain\* or cerebr\* or intracerebr\* or crani\* or intracran\* or head\* or subarachnoid\*  
 or subdural\* or epidural\* or extradural\*) adj (haematoma\* or hematoma\* or hemorrhag\*  
 or haemorrhag\* or pressur\* or bleed\*).tw. (4083)

10 or/1-9 (9638)

11 exp Spinal Cord Injuries/ (881)

1  
2  
3  
4 12 exp Central Cord Syndrome/ (0)  
5 13 (myelopathy adj3 (traumatic or post-traumatic)).tw,kw. (1)  
6 14 ((spine or spinal) adj3 (fracture\* or wound\* or trauma\* or injur\* or  
7 damag\*)).tw,kw. (2155)  
8 15 (spinal cord adj3 (contusion\* or laceration\* or transaction\* or trauma\* or  
9 ischemi\*)).tw,kw. (144)  
10 16 SCI.tw,kw. (840)  
11 17 exp Paraplegia/ (164)  
12 18 exp Quadriplegia/ (142)  
13 19 (paraplegia\* or quadriplegia\* or tetraplegia\*).tw,kw. (355)  
14 20 Spinal Cord Compression/ (77)  
15 21 exp Cervical Vertebrae/in (3)  
16 22 central spinal cord syndrome.tw,kw. (1)  
17 23 central cord injury syndrome.tw,kw. (0)  
18 24 or/11-23 (2772)  
19 25 Brain Death/ (46)  
20 26 (brain adj2 (death or dead)).tw,kw. (158)  
21 27 ((vegetat\* or unawareness\* or "minimally conscious") adj2 state\*1).tw,kw. (89)  
22 28 (prolonged adj2 unawareness\*).tw,kw. (0)  
23 29 25 or 26 or 27 or 28 (254)  
24 30 (central nervous system adj2 trauma\*).tw,kw. (1)  
25 31 (CNS adj2 trauma\*).tw,kw. (3)  
26 32 10 or 24 or 29 or 30 or 31 (12479)  
27 33 exp Cognition/ (7913)  
28 34 exp Cognition Disorders/ (3101)  
29 35 neurocognit\*.tw,kw. (1356)  
30 36 (cognitive or cognition).tw,kw. (31319)  
31 37 Executive Function/ (529)  
32 38 (executive adj2 (function\* or control\*)).tw,kw. (2114)  
33 39 exp Arousal/ (7319)  
34 40 arous\*.tw,kw. (3311)  
35 41 attention\*.tw,kw. (14257)  
36 42 vigilan\*.tw,kw. (1569)  
37 43 or/33-42 (51427)  
38 44 32 and 43 (1263)  
39 45 (dementi\* or alzheimer\*).tw,kw. (8989)  
40 46 exp dementia/ (3609)  
41 47 45 or 46 (9451)  
42 48 32 and 47 (142)  
43 49 44 or 48 (1328)  
44 50 limit 49 to english language (1135)

52  
53 \*\*\*\*\*

54  
55 **Embase** <1974 to 2016 November 30>

56 Search Strategy:  
57  
58  
59  
60

- 
- 1 exp brain injury/ (158616)  
2 head injury/ (47431)  
3 mTBI\*2.tw. (2626)  
4 tbi\*2.tw. (31097)  
5 concuss\*.tw. (7222)  
6 ((head\* or cerebr\* or crani\* or capitis\* or brain\* or forebrain\* or skull\* or  
7 hemispher\* or intracran\* or orbit\*) adj2 (injur\* or trauma\* or lesion\* or damag\* or  
8 wound\* or destruction\* or swell\* or oedema\* or edema\* or fracture\* or contusion\* or  
9 commotion\* or pressur\*)).tw. (215012)  
10  
11 ((brain\* or cerebr\* or intracerebr\* or crani\* or intracran\* or head\* or subarachnoid\*  
12 or subdural\* or epidural\* or extradural\*) adj (haematoma\* or hematoma\* or hemorrhag\*  
13 or haemorrhag\* or pressur\* or bleed\*)).tw. (97349)  
14  
15 or/1-7 (357773)  
16  
17 exp spinal cord injury/ (66659)  
18 spinal cord ischemia/ (3451)  
19 (myelopathy adj3 (traumatic or post-traumatic)).tw. (113)  
20  
21 ((spine or spinal) adj3 (fracture\* or wound\* or trauma\* or injur\* or damag\*)).tw.  
22 (59117)  
23 (spinal cord adj3 (contusion\* or laceration\* or transaction\* or trauma\* or  
24 ischemi\*)).tw. (8264)  
25  
26 SCI.tw. (37297)  
27  
28 paraplegia/ (21869)  
29 quadriplegia/ (15330)  
30 (paraplegia\* or quadriplegia\* or tetraplegia\*).tw. (19145)  
31  
32 central spinal cord syndrome.tw. (8)  
33 central cord injury syndrome.tw. (1)  
34  
35 or/9-19 (136685)  
36  
37 brain death/ (12613)  
38 (brain adj2 (death or dead)).tw. (10828)  
39 ((vegetat\* or unawareness\* or "minimally conscious") adj2 state\*1).tw. (4046)  
40 (prolonged adj2 unawareness\*).tw. (12)  
41  
42 21 or 22 or 23 or 24 (19386)  
43 (central nervous system adj2 trauma\*).tw. (360)  
44 (CNS adj2 trauma\*).tw. (602)  
45  
46 8 or 20 or 25 or 26 or 27 (499222)  
47 exp cognition/ (1941327)  
48 cognitive defect/ (138285)  
49 neurocognit\*.tw. (21396)  
50 (cognitive or cognition).tw. (380936)  
51 executive function/ (26536)  
52 (executive adj2 (function\* or control\*)).tw. (28576)  
53 arousal/ (41038)  
54 arous\*.tw. (38982)  
55 attention\*.tw. (399204)  
56  
57 vigilan\*.tw. (21941)  
58  
59  
60

1  
 2  
 3  
 4 39 or/29-38 (2408211)  
 5 40 exp dementia/ (300566)  
 6 41 (dementi\* or alzhem\*).tw. (224692)  
 7 42 40 or 41 (323799)  
 8 43 39 or 42 (2608334)  
 9 44 28 and 43 (96287)  
 10 45 exp clinical trial/ (1281583)  
 11 46 exp "clinical trial (topic)"/ (267609)  
 12 47 (randomi?ed adj7 trial\*).tw. (373380)  
 13 48 (controlled adj3 trial\*).tw. (250872)  
 14 49 (clinical adj2 trial\*).tw. (384066)  
 15 50 ((single or doubl\* or tripl\* or treb\*) and (blind\* or mask\*)).tw. (219774)  
 16 51 ("4 arm" or "four arm").tw. (1207)  
 17 52 exp case control study/ (140524)  
 18 53 control group/ (263620)  
 19 54 clinical study/ or retrospective study/ (765384)  
 20 55 ((case\* adj5 control\*) or (case adj3 comparison\*) or control group\*).tw. (668069)  
 21 56 cohort analysis/ (303792)  
 22 57 longitudinal study/ (106182)  
 23 58 follow up/ (1232689)  
 24 59 prospective study/ (388763)  
 25 60 cohort.tw. (568512)  
 26 61 longitudinal.tw. (231900)  
 27 62 prospective.tw. (629993)  
 28 63 retrospective.tw. (576605)  
 29 64 or/45-63 (4750710)  
 30 65 44 and 64 (27389)  
 31 66 limit 65 to english language (26109)  
 32 67 limit 66 to embase (12609)  
 33 \*\*\*\*\*  
 34  
 35  
 36  
 37  
 38  
 39  
 40  
 41  
 42  
 43  
 44  
 45  
 46  
 47  
 48  
 49  
 50  
 51  
 52  
 53  
 54  
 55  
 56  
 57  
 58  
 59  
 60

**PsycINFO** <1806 to November Week 4 2016>

Search Strategy:

-----  
 1 exp traumatic brain injury/ (15045)  
 2 exp head injuries/ (5474)  
 3 mTBI\*2.tw. (1222)  
 4 tbi\*2.tw. (8250)  
 5 concuss\*.tw. (2204)  
 6 ((head\* or cerebr\* or crani\* or capitis\* or brain\* or forebrain\* or skull\* or  
 7 hemispher\* or intracran\* or orbit\*) adj2 (injur\* or trauma\* or lesion\* or damag\* or  
 8 wound\* or destruction\* or swell\* or oedema\* or edema\* or fracture\* or contusion\* or  
 9 commotion\* or pressur\*).tw. (50900)  
 10 7 ((brain\* or cerebr\* or intracerebr\* or crani\* or intracran\* or head\* or subarachnoid\*  
 11 or subdural\* or epidural\* or extradural\*) adj (haematoma\* or hematoma\* or hemorrhag\*  
 12 or haemorrhag\* or pressur\* or bleed\*).tw. (4816)

1  
2  
3  
4  
5  
6  
7  
8  
9  
10  
11  
12  
13  
14  
15  
16  
17  
18  
19  
20  
21  
22  
23  
24  
25  
26  
27  
28  
29  
30  
31  
32  
33  
34  
35  
36  
37  
38  
39  
40  
41  
42  
43  
44  
45  
46  
47  
48  
49  
50  
51  
52  
53  
54  
55  
56  
57  
58  
59  
60

8 or/1-7 (55142)  
9 exp spinal cord injuries/ (4891)  
10 exp Spinal Cord/ and exp Ischemia/ (63)  
11 (myelopathy adj3 (traumatic or post-traumatic)).tw. (7)  
12 ((spine or spinal) adj3 (fracture\* or wound\* or trauma\* or injur\* or damag\*)).tw.  
(5852)  
13 (spinal cord adj3 (contusion\* or laceration\* or transaction\* or trauma\* or  
ischemi\*)).tw. (848)  
14 SCI.tw. (3541)  
15 paraplegia/ (534)  
16 quadriplegia/ (188)  
17 (paraplegia\* or quadriplegia\* or tetraplegia\*).tw. (1302)  
18 central spinal cord syndrome.tw. (0)  
19 central cord injury syndrome.tw. (0)  
20 or/9-19 (9003)  
21 (brain adj2 (death or dead)).tw. (581)  
22 ((vegetat\* or unawareness\* or "minimally conscious") adj2 state\*1).tw. (1069)  
23 (prolonged adj2 unawareness\*).tw. (2)  
24 21 or 22 or 23 (1611)  
25 (central nervous system adj2 trauma\*).tw. (56)  
26 (CNS adj2 trauma\*).tw. (112)  
27 8 or 20 or 24 or 25 or 26 (64469)  
28 cognition/ (26647)  
29 cognitive impairment/ (29197)  
30 neurocognit\*.tw. (11048)  
31 (cognitive or cognition).tw. (385119)  
32 exp executive function/ (11055)  
33 (executive adj2 (function\* or control\*)).tw. (21794)  
34 physiological arousal/ (6451)  
35 exp attention/ (59769)  
36 arous\*.tw. (33693)  
37 attention\*.tw. (232302)  
38 vigilan\*.tw. (8933)  
39 or/28-38 (631554)  
40 (dementi\* or alzhem\*).tw. (82601)  
41 exp dementia/ (63311)  
42 alzheimer's disease/ (38544)  
43 41 or 42 (63311)  
44 39 or 43 (668410)  
45 27 and 44 (17822)  
46 clinical trials/ (10032)  
47 (randomi?ed adj7 trial\*).tw. (40375)  
48 (controlled adj3 trial\*).tw. (33223)  
49 (clinical adj2 trial\*).tw. (28656)  
50 ((single or doubl\* or tripl\* or treb\*) and (blind\* or mask\*)).tw. (25275)  
51 ("4 arm" or "four arm").tw. (125)

1  
 2  
 3  
 4 52 experiment controls/ (867)  
 5 53 retrospective studies/ (381)  
 6 54 ((case\* adj5 control\*) or (case adj3 comparison\*) or control group\*).tw. (81862)  
 7 55 exp Longitudinal Studies/ (15780)  
 8 56 longitudinal studies/ (15306)  
 9 57 Followup Studies/ (12353)  
 10 58 cohort.tw. (49483)  
 11 59 longitudinal.tw. (90266)  
 12 60 prospective.tw. (48210)  
 13 61 retrospective.tw. (28144)  
 14 62 or/46-61 (341322)  
 15 63 45 and 62 (2588)  
 16 64 limit 63 to english language (2504)

\*\*\*\*\*

### SCOPUS (3267 results on 2016.12.02)

(((TITLE-ABS-KEY("central spinal cord syndrome")) OR (TITLE-ABS-KEY("central  
 cord injury syndrome")) OR ((TITLE-ABS-KEY(mTBI\* OR tbi\* OR concuss\*)) OR  
 (TITLE-ABS-KEY(((head\* or cerebr\* or crani\* or capitis\* or brain\* or forebrain\* or  
 skull\* or hemispher\* or intracran\* or orbit\*) NEAR/2 (injur\* or trauma\* or lesion\* or  
 damag\* or wound\* or destruction\* or swell\*))) OR (TITLE-ABS-KEY(((head\* or  
 cerebr\* or crani\* or capitis\* or brain\* or forebrain\* or skull\* or hemispher\* or intracran\*  
 or orbit\*) NEAR/2 (oedema\* or edema\* or fracture\* or contusion\* or commotion\* or  
 pressur\*)))) OR (TITLE-ABS-KEY(((brain\* or cerebr\* or intracerebr\* or crani\* or  
 intracran\* or head\* or subarachnoid\* or subdural\* or epidural\* or extradural\*) NEAR/2  
 (haematoma\* or hematoma\* or hemorrhag\* or haemorrhag\* or pressur\* or bleed\*)))) OR  
 (TITLE-ABS-KEY((myelopathy NEAR/3 (traumatic or post-traumatic)))) OR (TITLE-  
 ABS-KEY(((spine or spinal) NEAR/3 (fracture\* or wound\* or trauma\* or injur\* or  
 damag\*))) OR (TITLE-ABS-KEY((spinal cord NEAR/3 (contusion\* or laceration\* or  
 transaction\* or trauma\* or ischemi\*))) OR (TITLE-ABS-KEY((paraplegia\* or  
 quadriplegia\* or tetraplegia\*))) OR (TITLE-ABS-KEY((brain NEAR/2 (death or  
 dead)))) OR (TITLE-ABS-KEY(((vegetat\* or unawareness\* or "minimally conscious")  
 NEAR/2 state\*)) OR (TITLE-ABS-KEY( (prolonged NEAR/2 unawareness\*)) OR  
 (TITLE-ABS-KEY( (central nervous system NEAR/2 trauma\*)) OR (TITLE-ABS-  
 KEY((CNS NEAR/2 trauma\*))) AND (((TITLE-ABS-KEY(cognitive or cognition OR  
 neurocogniti\*) OR TITLE-ABS-KEY((executive NEAR/2 (function\* or control\*)))) OR  
 (TITLE-ABS-KEY( arous\* OR attention\* OR vigilan\* OR dementi\* or alzhem\*)))  
 AND (((TITLE-ABS-KEY((controlled NEAR/3 trial\*)) OR TITLE-ABS-KEY((clinical  
 NEAR/2 trial\*)) OR TITLE-ABS-KEY(((single or doubl\* or tripl\* or treb\*) and (blind\*  
 or mask\*)) OR TITLE-ABS-KEY( ("4 arm" or "four arm")) OR TITLE-ABS-  
 KEY((case\* NEAR/5 control\*) ) OR TITLE-ABS-KEY((case NEAR/3 comparison\*) )  
 OR TITLE-ABS-KEY(control group\*) OR TITLE-ABS-KEY(cohort\* OR longitudinal  
 OR prospective OR retrospective))) OR (TITLE-ABS-KEY(random\*)) OR (TITLE-



1  
2  
3 ABS-KEY((randomized NEAR/7 trial\*) OR (randomised NEAR/7 trial\*))) AND (  
4 LIMIT-TO(LANGUAGE,"English" ) )  
5  
6  
7

8 **Pubmed Supplemental Search (835 results on 2016.12.05)**  
9

10 (((((((((((((((((((mTBI[Text Word] OR TBI[Text Word] OR concuss[Text Word]))) OR  
11 (((head\*[Text Word] OR cerebr\*[Text Word] OR cranium[Text Word] OR cranial[Text  
12 Word] OR capitis\*[Text Word] OR brain\*[Text Word] OR forebrain\*[Text Word] OR  
13 skull\*[Text Word] OR hemispher\*[Text Word] OR intracran\*[Text Word] OR  
14 orbit\*[Text Word])) AND (injur\*[Text Word] OR trauma\*[Text Word] OR lesion\*[Text  
15 Word] OR damag\*[Text Word] OR wound\*[Text Word] OR destruction\*[Text Word]  
16 OR swell\*[Text Word] OR oedema\*[Text Word] OR edema\*[Text Word] OR  
17 fracture\*[Text Word] OR contusion\*[Text Word] OR commotion\*[Text Word] OR  
18 pressur\*[Text Word]))) OR (((brain\*[Text Word] OR cerebr\*[Text Word] OR  
19 intracerebr\*[Text Word] OR cranium[Text Word] OR cranial[Text Word] OR  
20 intracran\*[Text Word] OR head\*[Text Word] OR subarachnoid\*[Text Word] OR  
21 subdural\*[Text Word] OR epidural\*[Text Word] OR extradural\*[Text Word])) AND  
22 (haematoma\*[Text Word] OR hematoma\*[Text Word] OR hemorrhag\*[Text Word] OR  
23 haemorrhag\*[Text Word] OR pressur\*[Text Word] OR bleed\*[Text Word])) OR  
24 ((traumatic myelopathy[Text Word] OR post-traumatic myelopathy[Text Word])) OR  
25 (((spine[Text Word] OR spinal[Text Word])) AND (fracture\*[Text Word] OR  
26 wound\*[Text Word] OR trauma\*[Text Word] OR injur\*[Text Word] OR damag\*[Text  
27 Word])) OR ((spinal cord[Text Word]) AND (contusion\*[Text Word] OR  
28 laceration\*[Text Word] OR transaction\*[Text Word] OR trauma\*[Text Word] OR  
29 ischemi\*[Text Word])) OR (((SCI[Text Word]) OR (paraplegia\*[Text Word] OR  
30 quadriplegia\*[Text Word] OR tetraplegia\*[Text Word]))) OR (("central spinal cord  
31 syndrome"[Text Word] OR "central cord injury syndrome"[Text Word])) OR ((brain  
32 death[Text Word] OR brain dead[Text Word]) OR prolonged unawareness\*[Text  
33 Word] OR ((vegetat\* state\*[Text Word] OR "state of unawareness"[Text Word] OR  
34 minimally conscious state\*[Text Word])) OR central nervous system trauma\*[Text  
35 Word] OR CNS Trauma\*[Text Word]) AND (((((((neurocognit\*[Text Word] OR  
36 cognition[Text Word] OR cognitive[Text Word])) OR executive function\*[Text Word]  
37 OR arous\*[Text Word] OR attention\*[Text Word] OR vigilan\*[Text Word] OR  
38 dement\*[Text Word] OR alzhem\*[Text Word])) AND (((((trial\*[Text Word] OR  
39 blind\*[Text Word] OR mark\*[Text Word] OR random\*[Text Word])) OR case  
40 control\*[Text Word] OR case comparison\*[Text Word] OR control group\*[Text  
41 Word] OR (cohort[Text Word] OR longitudinal[Text Word] OR retrospective[Text  
42 Word] OR prospective[Text Word]))) AND (((pubstatusaheadofprint OR publisher[sb]  
43 OR pubmednotmedline[sb]))) AND English[lang])) AND English[lang])  
44  
45  
46  
47  
48  
49  
50  
51  
52  
53  
54  
55  
56  
57  
58  
59  
60

**PRISMA-P (Preferred Reporting Items for Systematic review and Meta-Analysis Protocols) 2015 checklist: recommended items to address in a systematic review protocol\***

| Section and topic                 | Item No | Checklist item                                                                                                                                                                                  | Location; page(s) within the manuscript          |
|-----------------------------------|---------|-------------------------------------------------------------------------------------------------------------------------------------------------------------------------------------------------|--------------------------------------------------|
| <b>ADMINISTRATIVE INFORMATION</b> |         |                                                                                                                                                                                                 |                                                  |
| Title:                            |         |                                                                                                                                                                                                 |                                                  |
| Identification                    | 1a      | Identify the report as a protocol of a systematic review                                                                                                                                        | Title, abstract, manuscript; pgs. 1-29 (for now) |
| Update                            | 1b      | If the protocol is for an update of a previous systematic review, identify as such                                                                                                              | NA; original review protocol                     |
| Registration                      | 2       | If registered, provide the name of the registry (such as PROSPERO) and registration number                                                                                                      | PROSPERO: CRD42017055309                         |
| Authors:                          |         |                                                                                                                                                                                                 |                                                  |
| Contact                           | 3a      | Provide name, institutional affiliation, e-mail address of all protocol authors; provide physical mailing address of corresponding author                                                       | Title page: 1-2, L1-L45                          |
| Contributions                     | 3b      | Describe contributions of protocol authors and identify the guarantor of the review                                                                                                             | Pg.22, Paragraph: 2, L451-457                    |
| Amendments                        | 4       | If the protocol represents an amendment of a previously completed or published protocol, identify as such and list changes; otherwise, state plan for documenting important protocol amendments | N/A                                              |
| Support:                          |         |                                                                                                                                                                                                 |                                                  |
| Sources                           | 5a      | Indicate sources of financial or other support for the review                                                                                                                                   | Pg. 22, Paragraph: 3, L458-462                   |
| Sponsor                           | 5b      | Provide name for the review funder and/or sponsor                                                                                                                                               | Pg. 22, Paragraph: 3, L458-462                   |
| Role of sponsor or funder         | 5c      | Describe roles of funder(s), sponsor(s), and/or institution(s), if any, in developing the protocol                                                                                              | Pg. 22, Paragraph: 3, L458-462                   |
| <b>INTRODUCTION</b>               |         |                                                                                                                                                                                                 |                                                  |
| Rationale                         | 6       | Describe the rationale for the review in the context of what is already known                                                                                                                   | Pg. 5, Paragraph: 1, L91-112                     |
| Objectives                        | 7       | Provide an explicit statement of the question(s) the review will address with reference to participants, interventions, comparators, and outcomes (PICO)                                        | Pg. 8, Paragraph: 1, L156-172                    |
| <b>METHODS</b>                    |         |                                                                                                                                                                                                 |                                                  |
| Eligibility criteria              | 8       | Specify the study characteristics (such as PICO, study design, setting,                                                                                                                         | Pg. 9, L175-193                                  |



|                                    |     |                                                                                                                                                                                                                                                  |                                 |
|------------------------------------|-----|--------------------------------------------------------------------------------------------------------------------------------------------------------------------------------------------------------------------------------------------------|---------------------------------|
|                                    |     | time frame) and report characteristics (such as years considered, language, publication status) to be used as criteria for eligibility for the review                                                                                            |                                 |
| Information sources                | 9   | Describe all intended information sources (such as electronic databases, contact with study authors, trial registers or other grey literature sources) with planned dates of coverage                                                            | Pg. 12, L285-299                |
| Search strategy                    | 10  | Present draft of search strategy to be used for at least one electronic database, including planned limits, such that it could be repeated                                                                                                       | Pg. 12, L 248-255               |
| Study records:                     |     |                                                                                                                                                                                                                                                  |                                 |
| Data management                    | 11a | Describe the mechanism(s) that will be used to manage records and data throughout the review                                                                                                                                                     | Pg. 13, Paragraph: 2, L260      |
| Selection process                  | 11b | State the process that will be used for selecting studies (such as two independent reviewers) through each phase of the review (that is, screening, eligibility and inclusion in meta-analysis)                                                  | Pg. 13, Paragraph: 2, L260-268  |
| Data collection process            | 11c | Describe planned method of extracting data from reports (such as piloting forms, done independently, in duplicate), any processes for obtaining and confirming data from investigators                                                           | Pg. 13-14, L 270-283            |
| Data items                         | 12  | List and define all variables for which data will be sought (such as PICO items, funding sources), any pre-planned data assumptions and simplifications                                                                                          | Pg. 14, Paragraph: 1, L 276-283 |
| Outcomes and prioritization        | 13  | List and define all outcomes for which data will be sought, including prioritization of main and additional outcomes, with rationale                                                                                                             | Pg. 10-11, L195-236             |
| Risk of bias in individual studies | 14  | Describe anticipated methods for assessing risk of bias of individual studies, including whether this will be done at the outcome or study level, or both; state how this information will be used in data synthesis                             | Pg. 15-16, L315-340             |
| Data synthesis                     | 15a | Describe criteria under which study data will be quantitatively synthesised                                                                                                                                                                      | Pg. 14-15, L285-299             |
|                                    | 15b | If data are appropriate for quantitative synthesis, describe planned summary measures, methods of handling data and methods of combining data from studies, including any planned exploration of consistency (such as $I^2$ , Kendall's $\tau$ ) | Pg. 14-15, L285-299             |
|                                    | 15c | Describe any proposed additional analyses (such as sensitivity or subgroup analyses, meta-regression)                                                                                                                                            | Pg. 15, Paragraph: 2, L302-313  |
|                                    | 15d | If quantitative synthesis is not appropriate, describe the type of summary planned                                                                                                                                                               | N/A                             |
| Meta-bias(es)                      | 16  | Specify any planned assessment of meta-bias(es) (such as publication                                                                                                                                                                             | N/A                             |

1  
2  
3  
4  
5  
6  
7  
8  
9  
10  
11  
12  
13  
14  
15  
16  
17  
18  
19  
20  
21  
22  
23  
24  
25  
26  
27  
28  
29  
30  
31  
32  
33  
34  
35  
36  
37  
38  
39  
40  
41  
42  
43  
44  
45  
46  
47  
48  
49

---

|                                   |    |                                                                                    |                     |
|-----------------------------------|----|------------------------------------------------------------------------------------|---------------------|
|                                   |    | bias across studies, selective reporting within studies)                           |                     |
| Confidence in cumulative evidence | 17 | Describe how the strength of the body of evidence will be assessed (such as GRADE) | Pg. 15-18, L315-366 |

---

**\* It is strongly recommended that this checklist be read in conjunction with the PRISMA-P Explanation and Elaboration (cite when available) for important clarification on the items. Amendments to a review protocol should be tracked and dated. The copyright for PRISMA-P (including checklist) is held by the PRISMA-P Group and is distributed under a Creative Commons Attribution Licence 4.0.**

*From: Shamseer L, Moher D, Clarke M, Ghersi D, Liberati A, Petticrew M, Shekelle P, Stewart L, PRISMA-P Group. Preferred reporting items for systematic review and meta-analysis protocols (PRISMA-P) 2015: elaboration and explanation. BMJ. 2015 Jan 2;349(jan02 1):g7647.*
