# Supplementary material for: The course and prognostic factors of cognitive status after central nervous system trauma: a systematic review protocol
Source: PubMed Central journal article supplement — BMJ Open. 2017 Sep 18;7(9):e017165. doi: 10.1136/bmjopen-2017-017165 (PMC5623529; doi:10.1136/bmjopen-2017-017165), 2017-09-18
Supplement: bmjopen-2017-017165supp001.pdf [file bmjopen-2017-017165supp001.pdf]

## **SEARCH DETAILS**

Searches conducted in Medline and Medline in-process, Embase, Cochrane Central Register of Controlled Trials, PsycINFO. A supplemental search was conducted in Pubmed to identify non-Medline records. All searches were conducted from inception of the database to December 2016. All searches were limited to English. Searches were conducted by an Information Specialist (JB).

## **PRE-DUPLICATE REMOVAL**

TOTAL Results: 29564

Medline: 9214

Embase: 12609

Central: 1135

PsycINFO: 2504

Scopus: 3267

Supplemental Pubmed search for NON-MEDLINE results: 835

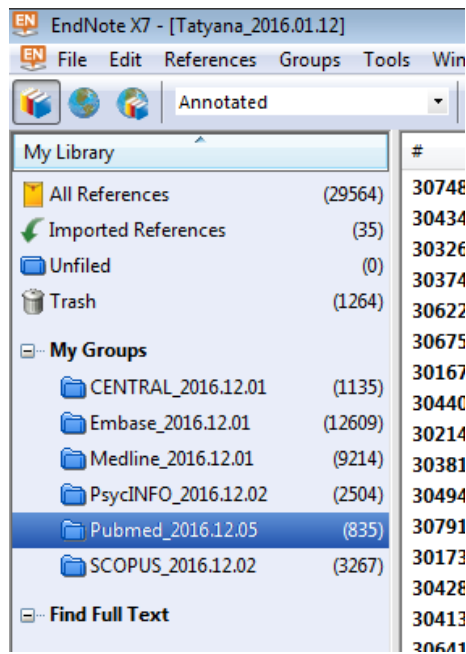

The screenshot shows the EndNote X7 interface with a menu bar (File, Edit, References, Groups, Tools, Windows) and a toolbar. The main window displays a list of library folders under 'My Library'. The folders and their counts are: All References (29564), Imported References (35), Unfiled (0), Trash (1264), My Groups (expanded), CENTRAL\_2016.12.01 (1135), Embase\_2016.12.01 (12609), Medline\_2016.12.01 (9214), PsycINFO\_2016.12.02 (2504), Pubmed\_2016.12.05 (835), and SCOPUS\_2016.12.02 (3267). A column on the right shows numerical values, some of which are crossed out with a red 'X'.

| Library Folder      | Count   | Value |
|---------------------|---------|-------|
| All References      | (29564) | 30748 |
| Imported References | (35)    | 30434 |
| Unfiled             | (0)     | 30326 |
| Trash               | (1264)  | 30374 |
| My Groups           |         | 30622 |
| CENTRAL_2016.12.01  | (1135)  | 30675 |
| Embase_2016.12.01   | (12609) | 30167 |
| Medline_2016.12.01  | (9214)  | 30440 |
| PsycINFO_2016.12.02 | (2504)  | 30214 |
| Pubmed_2016.12.05   | (835)   | 30381 |
| SCOPUS_2016.12.02   | (3267)  | 30494 |
| Find Full Text      |         | 30791 |
|                     |         | 30173 |
|                     |         | 30428 |
|                     |         | 30413 |
|                     |         | 30641 |

## **POST-QUICK DUPLICATE REMOVAL**

TOTAL Results: 22654

Duplicates Removed: 6910

Medline: 8197

Embase: 11557

Central: 354

PsycINFO: 882

Scopus: 1213

Supplemental Pubmed search for NON-MEDLINE results: 451

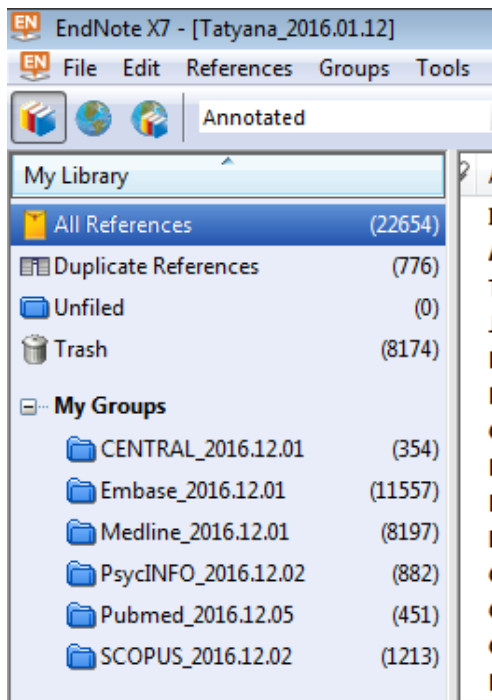

## **SEARCH STRATEGIES**

### **Epub Ahead of Print, In-Process & Other Non-Indexed Citations, Ovid MEDLINE(R) Daily and Ovid MEDLINE(R) <1946 to Present>**

Search Strategy:

- 
- 1 exp brain injuries/ (62019)
  - 2 Craniocerebral Trauma/ (21460)
  - 3 exp Head Injuries, Closed/ (9310)
  - 4 exp Skull Fractures/ (20416)
  - 5 mTBI\*2.tw. (1804)
  - 6 tbi\*2.tw. (21603)
  - 7 concuss\*.tw. (6210)
  - 8 ((head\* or cerebr\* or crani\* or capitis\* or brain\* or forebrain\* or skull\* or hemispher\* or intracran\* or orbit\*) adj2 (injur\* or trauma\* or lesion\* or damag\* or wound\* or destruction\* or swell\* or oedema\* or edema\* or fracture\* or contusion\* or commotion\* or pressur\*)).tw. (175759)
  - 9 ((brain\* or cerebr\* or intracerebr\* or crani\* or intracran\* or head\* or subarachnoid\* or subdural\* or epidural\* or extradural\*) adj (haematoma\* or hematoma\* or hemorrhag\* or haemorrhag\* or pressur\* or bleed\*)).tw. (76211)
  - 10 or/1-9 (270610)
  - 11 exp Spinal Cord Injuries/ (44778)
  - 12 exp Central Cord Syndrome/ (83)
  - 13 (myelopathy adj3 (traumatic or post-traumatic)).tw,kw. (98)
  - 14 ((spine or spinal) adj3 (fracture\* or wound\* or trauma\* or injur\* or damag\*)).tw,kw. (49823)
  - 15 (spinal cord adj3 (contusion\* or laceration\* or transaction\* or trauma\* or ischemi\*)).tw,kw. (7108)

16 SCI.tw,kw. (30348)  
17 exp Paraplegia/ (12903)  
18 exp Quadriplegia/ (7861)  
19 (paraplegia\* or quadriplegia\* or tetraplegia\*).tw,kw. (16952)  
20 Spinal Cord Compression/ (10657)  
21 exp Cervical Vertebrae/in (7544)  
22 central spinal cord syndrome.tw,kw. (10)  
23 central cord injury syndrome.tw,kw. (1)  
24 or/11-23 (108760)  
25 Brain Death/ (8074)  
26 (brain adj2 (death or dead)).tw,kw. (7913)  
27 ((vegetat\* or unawareness\* or "minimally conscious") adj2 state\*1).tw,kw. (3285)  
28 (prolonged adj2 unawareness\*).tw,kw. (10)  
29 25 or 26 or 27 or 28 (14590)  
30 (central nervous system adj2 trauma\*).tw,kw. (334)  
31 (CNS adj2 trauma\*).tw,kw. (529)  
32 10 or 24 or 29 or 30 or 31 (384413)  
33 exp Cognition/ (142070)  
34 exp Cognition Disorders/ (85970)  
35 neurocognit\*.tw,kw. (17260)  
36 (cognitive or cognition).tw,kw. (316220)  
37 Executive Function/ (10349)  
38 (executive adj2 (function\* or control\*)).tw,kw. (23269)  
39 exp Arousal/ (114735)  
40 arous\*.tw,kw. (32131)  
41 attention\*.tw,kw. (343363)  
42 vigilan\*.tw,kw. (17025)  
43 or/33-42 (818304)  
44 32 and 43 (29440)  
45 (dementi\* or alzheimer\*).tw,kw. (188105)  
46 exp dementia/ (154811)  
47 45 or 46 (227210)  
48 32 and 47 (8285)  
49 exp clinical trial/ (816969)  
50 exp Clinical Trials as Topic/ (323082)  
51 multicenter studies as topic/ (17817)  
52 (randomi?ed adj7 trial\*).tw,kw. (309575)  
53 (controlled adj3 trial\*).tw,kw. (213828)  
54 (clinical adj2 trial\*).tw,kw. (309587)  
55 ((single or doubl\* or tripl\* or treb\*) and (blind\* or mask\*)).tw,kw. (174728)  
56 ("4 arm" or "four arm").tw,kw. (928)  
57 or/49-56 (1341652)  
Annotation: Clinical trial SOURCE:  
[http://libguides.sph.uth.tmc.edu/search\\_filters/ovid\\_medline\\_filters](http://libguides.sph.uth.tmc.edu/search_filters/ovid_medline_filters)  
58 Case-Control Studies/ (250991)  
59 Control Groups/ (1791)

- 60 Matched-Pair Analysis/ (4926)
- 61 retrospective studies/ (643251)
- 62 ((case\* adj5 control\*) or (case adj3 comparison\*) or control group\*).tw,kw.  
(528797)
- 63 or/58-62 (1282282)

Annotation: Case control SOURCE:

[http://libguides.sph.uth.tmc.edu/search\\_filters/ovid\\_medline\\_filters](http://libguides.sph.uth.tmc.edu/search_filters/ovid_medline_filters)

- 64 cohort studies/ (233586)
- 65 longitudinal studies/ (120931)
- 66 follow-up studies/ (595123)
- 67 prospective studies/ (464936)
- 68 cohort.tw,kw. (404386)
- 69 longitudinal.tw,kw. (206890)
- 70 prospective.tw,kw. (477259)
- 71 retrospective.tw,kw. (391544)
- 72 or/64-71 (1958903)

Annotation: Cohort source:

[http://libguides.sph.uth.tmc.edu/search\\_filters/ovid\\_medline\\_filters](http://libguides.sph.uth.tmc.edu/search_filters/ovid_medline_filters)

- 73 controlled before-after studies/ or interrupted time series analysis/ (462)
- 74 57 or 63 or 72 or 73 (3688853)
- 75 44 and 74 (8776)
- 76 48 and 74 (1798)
- 77 75 or 76 (9756)
- 78 limit 77 to english language (9214)

\*\*\*\*\*

## **Cochrane Central Register of Controlled Trials <October 2016>**

Search Strategy:

- 
- 1 exp brain injuries/ (1087)
  - 2 Craniocerebral Trauma/ (244)
  - 3 exp Head Injuries, Closed/ (156)
  - 4 exp Skull Fractures/ (178)
  - 5 mTBI\*2.tw. (85)
  - 6 tbi\*2.tw. (1060)
  - 7 concuss\*.tw. (147)
  - 8 ((head\* or cerebr\* or crani\* or capitis\* or brain\* or forebrain\* or skull\* or hemispher\* or intracran\* or orbit\*) adj2 (injur\* or trauma\* or lesion\* or damag\* or wound\* or destruction\* or swell\* or oedema\* or edema\* or fracture\* or contusion\* or commotion\* or pressur\*).tw. (5744)
  - 9 ((brain\* or cerebr\* or intracerebr\* or crani\* or intracran\* or head\* or subarachnoid\* or subdural\* or epidural\* or extradural\*) adj (haematoma\* or hematoma\* or hemorrhag\* or haemorrhag\* or pressur\* or bleed\*).tw. (4083)
  - 10 or/1-9 (9638)
  - 11 exp Spinal Cord Injuries/ (881)

- 12 exp Central Cord Syndrome/ (0)
- 13 (myelopathy adj3 (traumatic or post-traumatic)).tw,kw. (1)
- 14 ((spine or spinal) adj3 (fracture\* or wound\* or trauma\* or injur\* or damag\*)).tw,kw. (2155)
- 15 (spinal cord adj3 (contusion\* or laceration\* or transaction\* or trauma\* or ischemi\*)).tw,kw. (144)
- 16 SCI.tw,kw. (840)
- 17 exp Paraplegia/ (164)
- 18 exp Quadriplegia/ (142)
- 19 (paraplegia\* or quadriplegia\* or tetraplegia\*).tw,kw. (355)
- 20 Spinal Cord Compression/ (77)
- 21 exp Cervical Vertebrae/in (3)
- 22 central spinal cord syndrome.tw,kw. (1)
- 23 central cord injury syndrome.tw,kw. (0)
- 24 or/11-23 (2772)
- 25 Brain Death/ (46)
- 26 (brain adj2 (death or dead)).tw,kw. (158)
- 27 ((vegetat\* or unawareness\* or "minimally conscious") adj2 state\*1).tw,kw. (89)
- 28 (prolonged adj2 unawareness\*).tw,kw. (0)
- 29 25 or 26 or 27 or 28 (254)
- 30 (central nervous system adj2 trauma\*).tw,kw. (1)
- 31 (CNS adj2 trauma\*).tw,kw. (3)
- 32 10 or 24 or 29 or 30 or 31 (12479)
- 33 exp Cognition/ (7913)
- 34 exp Cognition Disorders/ (3101)
- 35 neurocognit\*.tw,kw. (1356)
- 36 (cognitive or cognition).tw,kw. (31319)
- 37 Executive Function/ (529)
- 38 (executive adj2 (function\* or control\*)).tw,kw. (2114)
- 39 exp Arousal/ (7319)
- 40 arous\*.tw,kw. (3311)
- 41 attention\*.tw,kw. (14257)
- 42 vigilan\*.tw,kw. (1569)
- 43 or/33-42 (51427)
- 44 32 and 43 (1263)
- 45 (dementi\* or alzheimer\*).tw,kw. (8989)
- 46 exp dementia/ (3609)
- 47 45 or 46 (9451)
- 48 32 and 47 (142)
- 49 44 or 48 (1328)
- 50 limit 49 to english language (1135)

\*\*\*\*\*

**Embase** <1974 to 2016 November 30>  
 Search Strategy:

- 
- 1 exp brain injury/ (158616)
  - 2 head injury/ (47431)
  - 3 mTBI\*2.tw. (2626)
  - 4 tbi\*2.tw. (31097)
  - 5 concuss\*.tw. (7222)
  - 6 ((head\* or cerebr\* or crani\* or capitis\* or brain\* or forebrain\* or skull\* or hemispher\* or intracran\* or orbit\*) adj2 (injur\* or trauma\* or lesion\* or damag\* or wound\* or destruction\* or swell\* or oedema\* or edema\* or fracture\* or contusion\* or commotion\* or pressur\*)).tw. (215012)
  - 7 ((brain\* or cerebr\* or intracerebr\* or crani\* or intracran\* or head\* or subarachnoid\* or subdural\* or epidural\* or extradural\*) adj (haematoma\* or hematoma\* or hemorrhag\* or haemorrhag\* or pressur\* or bleed\*)).tw. (97349)
  - 8 or/1-7 (357773)
  - 9 exp spinal cord injury/ (66659)
  - 10 spinal cord ischemia/ (3451)
  - 11 (myelopathy adj3 (traumatic or post-traumatic)).tw. (113)
  - 12 ((spine or spinal) adj3 (fracture\* or wound\* or trauma\* or injur\* or damag\*)).tw. (59117)
  - 13 (spinal cord adj3 (contusion\* or laceration\* or transaction\* or trauma\* or ischemi\*)).tw. (8264)
  - 14 SCI.tw. (37297)
  - 15 paraplegia/ (21869)
  - 16 quadriplegia/ (15330)
  - 17 (paraplegia\* or quadriplegia\* or tetraplegia\*).tw. (19145)
  - 18 central spinal cord syndrome.tw. (8)
  - 19 central cord injury syndrome.tw. (1)
  - 20 or/9-19 (136685)
  - 21 brain death/ (12613)
  - 22 (brain adj2 (death or dead)).tw. (10828)
  - 23 ((vegetat\* or unawareness\* or "minimally conscious") adj2 state\*1).tw. (4046)
  - 24 (prolonged adj2 unawareness\*).tw. (12)
  - 25 21 or 22 or 23 or 24 (19386)
  - 26 (central nervous system adj2 trauma\*).tw. (360)
  - 27 (CNS adj2 trauma\*).tw. (602)
  - 28 8 or 20 or 25 or 26 or 27 (499222)
  - 29 exp cognition/ (1941327)
  - 30 cognitive defect/ (138285)
  - 31 neurocognit\*.tw. (21396)
  - 32 (cognitive or cognition).tw. (380936)
  - 33 executive function/ (26536)
  - 34 (executive adj2 (function\* or control\*)).tw. (28576)
  - 35 arousal/ (41038)
  - 36 arous\*.tw. (38982)
  - 37 attention\*.tw. (399204)
  - 38 vigilan\*.tw. (21941)

39 or/29-38 (2408211)  
 40 exp dementia/ (300566)  
 41 (dementi\* or alzhem\*).tw. (224692)  
 42 40 or 41 (323799)  
 43 39 or 42 (2608334)  
 44 28 and 43 (96287)  
 45 exp clinical trial/ (1281583)  
 46 exp "clinical trial (topic)"/ (267609)  
 47 (randomi?ed adj7 trial\*).tw. (373380)  
 48 (controlled adj3 trial\*).tw. (250872)  
 49 (clinical adj2 trial\*).tw. (384066)  
 50 ((single or doubl\* or tripl\* or treb\*) and (blind\* or mask\*)).tw. (219774)  
 51 ("4 arm" or "four arm").tw. (1207)  
 52 exp case control study/ (140524)  
 53 control group/ (263620)  
 54 clinical study/ or retrospective study/ (765384)  
 55 ((case\* adj5 control\*) or (case adj3 comparison\*) or control group\*).tw. (668069)  
 56 cohort analysis/ (303792)  
 57 longitudinal study/ (106182)  
 58 follow up/ (1232689)  
 59 prospective study/ (388763)  
 60 cohort.tw. (568512)  
 61 longitudinal.tw. (231900)  
 62 prospective.tw. (629993)  
 63 retrospective.tw. (576605)  
 64 or/45-63 (4750710)  
 65 44 and 64 (27389)  
 66 limit 65 to english language (26109)  
 67 limit 66 to embase (12609)  
 \*\*\*\*\*

**PsycINFO <1806 to November Week 4 2016>**

**Search Strategy:**

---

1 exp traumatic brain injury/ (15045)  
 2 exp head injuries/ (5474)  
 3 mTBI\*2.tw. (1222)  
 4 tbi\*2.tw. (8250)  
 5 concuss\*.tw. (2204)  
 6 ((head\* or cerebr\* or crani\* or capitis\* or brain\* or forebrain\* or skull\* or  
 hemispher\* or intracran\* or orbit\*) adj2 (injur\* or trauma\* or lesion\* or damag\* or  
 wound\* or destruction\* or swell\* or oedema\* or edema\* or fracture\* or contusion\* or  
 commotion\* or pressur\*)).tw. (50900)  
 7 ((brain\* or cerebr\* or intracerebr\* or crani\* or intracran\* or head\* or subarachnoid\*  
 or subdural\* or epidural\* or extradural\*) adj (haematoma\* or hematoma\* or hemorrhag\*  
 or haemorrhag\* or pressur\* or bleed\*)).tw. (4816)

8 or/1-7 (55142)  
9 exp spinal cord injuries/ (4891)  
10 exp Spinal Cord/ and exp Ischemia/ (63)  
11 (myelopathy adj3 (traumatic or post-traumatic)).tw. (7)  
12 ((spine or spinal) adj3 (fracture\* or wound\* or trauma\* or injur\* or damag\*)).tw.  
(5852)  
13 (spinal cord adj3 (contusion\* or laceration\* or transaction\* or trauma\* or  
ischemi\*)).tw. (848)  
14 SCI.tw. (3541)  
15 paraplegia/ (534)  
16 quadriplegia/ (188)  
17 (paraplegia\* or quadriplegia\* or tetraplegia\*).tw. (1302)  
18 central spinal cord syndrome.tw. (0)  
19 central cord injury syndrome.tw. (0)  
20 or/9-19 (9003)  
21 (brain adj2 (death or dead)).tw. (581)  
22 ((vegetat\* or unawareness\* or "minimally conscious") adj2 state\*1).tw. (1069)  
23 (prolonged adj2 unawareness\*).tw. (2)  
24 21 or 22 or 23 (1611)  
25 (central nervous system adj2 trauma\*).tw. (56)  
26 (CNS adj2 trauma\*).tw. (112)  
27 8 or 20 or 24 or 25 or 26 (64469)  
28 cognition/ (26647)  
29 cognitive impairment/ (29197)  
30 neurocognit\*.tw. (11048)  
31 (cognitive or cognition).tw. (385119)  
32 exp executive function/ (11055)  
33 (executive adj2 (function\* or control\*)).tw. (21794)  
34 physiological arousal/ (6451)  
35 exp attention/ (59769)  
36 arous\*.tw. (33693)  
37 attention\*.tw. (232302)  
38 vigilan\*.tw. (8933)  
39 or/28-38 (631554)  
40 (dementi\* or alzhaim\*).tw. (82601)  
41 exp dementia/ (63311)  
42 alzheimer's disease/ (38544)  
43 41 or 42 (63311)  
44 39 or 43 (668410)  
45 27 and 44 (17822)  
46 clinical trials/ (10032)  
47 (randomi?ed adj7 trial\*).tw. (40375)  
48 (controlled adj3 trial\*).tw. (33223)  
49 (clinical adj2 trial\*).tw. (28656)  
50 ((single or doubl\* or tripl\* or treb\*) and (blind\* or mask\*)).tw. (25275)  
51 ("4 arm" or "four arm").tw. (125)



- 52 experiment controls/ (867)
- 53 retrospective studies/ (381)
- 54 ((case\* adj5 control\*) or (case adj3 comparison\*) or control group\*).tw. (81862)
- 55 exp Longitudinal Studies/ (15780)
- 56 longitudinal studies/ (15306)
- 57 Followup Studies/ (12353)
- 58 cohort.tw. (49483)
- 59 longitudinal.tw. (90266)
- 60 prospective.tw. (48210)
- 61 retrospective.tw. (28144)
- 62 or/46-61 (341322)
- 63 45 and 62 (2588)
- 64 limit 63 to english language (2504)

\*\*\*\*\*

**SCOPUS (3267 results on 2016.12.02)**

(((((TITLE-ABS-KEY("central spinal cord syndrome")) OR (TITLE-ABS-KEY("central cord injury syndrome")) OR ((TITLE-ABS-KEY(mTBI\* OR tbi\* OR concuss\*)) OR (TITLE-ABS-KEY(((head\* or cerebr\* or crani\* or capitis\* or brain\* or forebrain\* or skull\* or hemispher\* or intracran\* or orbit\*) NEAR/2 (injur\* or trauma\* or lesion\* or damag\* or wound\* or destruction\* or swell\*)) )) OR (TITLE-ABS-KEY(((head\* or cerebr\* or crani\* or capitis\* or brain\* or forebrain\* or skull\* or hemispher\* or intracran\* or orbit\*) NEAR/2 (oedema\* or edema\* or fracture\* or contusion\* or commotion\* or pressur\*)))) OR (TITLE-ABS-KEY(((brain\* or cerebr\* or intracerebr\* or crani\* or intracran\* or head\* or subarachnoid\* or subdural\* or epidural\* or extradural\*) NEAR/2 (haematoma\* or hematoma\* or hemorrhag\* or haemorrhag\* or pressur\* or bleed\*)))) OR (TITLE-ABS-KEY((myelopathy NEAR/3 (traumatic or post-traumatic)))) OR (TITLE-ABS-KEY(((spine or spinal) NEAR/3 (fracture\* or wound\* or trauma\* or injur\* or damag\*))) OR (TITLE-ABS-KEY((spinal cord NEAR/3 (contusion\* or laceration\* or transaction\* or trauma\* or ischemi\*))) OR (TITLE-ABS-KEY((paraplegia\* or quadriplegia\* or tetraplegia\*)))) OR (TITLE-ABS-KEY((brain NEAR/2 (death or dead)))) OR (TITLE-ABS-KEY(((vegetat\* or unawareness\* or "minimally conscious") NEAR/2 state\*)) OR (TITLE-ABS-KEY( (prolonged NEAR/2 unawareness\*)) OR (TITLE-ABS-KEY( (central nervous system NEAR/2 trauma\*)) OR (TITLE-ABS-KEY((CNS NEAR/2 trauma\*)))) AND (((TITLE-ABS-KEY(cognitive or cognition OR neurocogniti\*) OR TITLE-ABS-KEY((executive NEAR/2 (function\* or control\*)))) OR (TITLE-ABS-KEY(arous\* OR attention\* OR vigilan\* OR dementi\* OR alzhem\*))) AND (((TITLE-ABS-KEY((controlled NEAR/3 trial\*)) OR TITLE-ABS-KEY((clinical NEAR/2 trial\*)) OR TITLE-ABS-KEY(((single or doubl\* or tripl\* or treb\*) and (blind\* or mask\*)) OR TITLE-ABS-KEY( ("4 arm" or "four arm")) OR TITLE-ABS-KEY((case\* NEAR/5 control\*) ) OR TITLE-ABS-KEY((case NEAR/3 comparison\*) ) OR TITLE-ABS-KEY(control group\*) OR TITLE-ABS-KEY(cohort\* OR longitudinal OR prospective OR retrospective))) OR (TITLE-ABS-KEY(random\*)) OR (TITLE-

ABS-KEY((randomized NEAR/7 trial\*) OR (randomised NEAR/7 trial\*)) AND ( LIMIT-TO(LANGUAGE,"English" ) )

### Pubmed Supplemental Search (835 results on 2016.12.05)

((((((((((((((((((((((mTBI[Text Word] OR TBI[Text Word] OR concuss[Text Word]))) OR (((head\*[Text Word] OR cerebr\*[Text Word] OR cranium[Text Word] OR cranial[Text Word] OR capitis\*[Text Word] OR brain\*[Text Word] OR forebrain\*[Text Word] OR skull\*[Text Word] OR hemispher\*[Text Word] OR intracran\*[Text Word] OR orbit\*[Text Word])) AND (injur\*[Text Word] OR trauma\*[Text Word] OR lesion\*[Text Word] OR damag\*[Text Word] OR wound\*[Text Word] OR destruction\*[Text Word] OR swell\*[Text Word] OR oedema\*[Text Word] OR edema\*[Text Word] OR fracture\*[Text Word] OR contusion\*[Text Word] OR commotion\*[Text Word] OR pressur\*[Text Word]))) OR (((brain\*[Text Word] OR cerebr\*[Text Word] OR intracerebr\*[Text Word] OR cranium[Text Word] OR cranial[Text Word] OR intracran\*[Text Word] OR head\*[Text Word] OR subarachnoid\*[Text Word] OR subdural\*[Text Word] OR epidural\*[Text Word] OR extradural\*[Text Word])) AND (haematoma\*[Text Word] OR hematoma\*[Text Word] OR hemorrhag\*[Text Word] OR haemorrhag\*[Text Word] OR pressur\*[Text Word] OR bleed\*[Text Word]))) OR ((traumatic myelopathy[Text Word] OR post-traumatic myelopathy[Text Word])) OR (((spine[Text Word] OR spinal[Text Word])) AND (fracture\*[Text Word] OR wound\*[Text Word] OR trauma\*[Text Word] OR injur\*[Text Word] OR damag\*[Text Word])) OR ((spinal cord[Text Word] AND (contusion\*[Text Word] OR laceration\*[Text Word] OR transaction\*[Text Word] OR trauma\*[Text Word] OR ischemi\*[Text Word])) OR (((SCI[Text Word] OR paraplegia\*[Text Word] OR quadriplegia\*[Text Word] OR tetraplegia\*[Text Word]))) OR (("central spinal cord syndrome"[Text Word] OR "central cord injury syndrome"[Text Word])) OR ((brain death[Text Word] OR brain dead[Text Word]) OR prolonged unawareness\*[Text Word] OR ((vegetat\* state\*[Text Word] OR "state of unawareness"[Text Word] OR minimally conscious state\*[Text Word])) OR central nervous system trauma\*[Text Word] OR CNS Trauma\*[Text Word]) AND (((((((neurocognit\*[Text Word] OR cognition[Text Word] OR cognitive[Text Word])) OR executive function\*[Text Word] OR arous\*[Text Word] OR attention\*[Text Word] OR vigilan\*[Text Word] OR dement\*[Text Word] OR alzhem\*[Text Word])) AND (((((trial\*[Text Word] OR blind\*[Text Word] OR mark\*[Text Word] OR random\*[Text Word])) OR case control\*[Text Word] OR case comparison\*[Text Word] OR control group\*[Text Word] OR (cohort[Text Word] OR longitudinal[Text Word] OR retrospective[Text Word] OR prospective[Text Word]))) AND (((pubstatusaheadofprint OR publisher[sb] OR pubmednotmedline[sb]))) AND English[lang])) AND English[lang])
